# Supplementary material
Source: ML conference proceedings conference paper supplement (https://openreview.net/forum?id=S000gKUEmP)
Supplement: supplementary_material [file attachment]

---

# Value-Based Abstraction Functions for Abstraction Sampling (Supplemental Materials)

---

Bobak Pezeshki<sup>1</sup>

Kalev Kask<sup>1</sup>

Alexander Ihler<sup>1</sup>

Rina Dechter<sup>1</sup>

<sup>1</sup>University of California, Irvine

## Abstract

For revised supplemental materials, please visit <https://ics.uci.edu/~dechter/publications.html>. This document includes supplemental background, descriptions, details, and results in extension to the main paper. Given its size, we suggest using the table of contents to navigate. For an additional background on graphical models, AND/OR search trees, and variable elimination, please view the EXTENDED BACKGROUND supplemental document.

## CONTENTS

|          |                                                                                           |           |
|----------|-------------------------------------------------------------------------------------------|-----------|
| <b>1</b> | <b>AOAS Background</b>                                                                    | <b>3</b>  |
| 1.1      | Sample Algorithm Trace . . . . .                                                          | 3         |
| 1.2      | Detailed Algorithm . . . . .                                                              | 3         |
| <b>2</b> | <b>Probe Size Variability</b>                                                             | <b>5</b>  |
| <b>3</b> | <b>Exact Abstraction Proofs</b>                                                           | <b>7</b>  |
| 3.1      | ORAS . . . . .                                                                            | 7         |
| 3.2      | AOAS . . . . .                                                                            | 8         |
| <b>4</b> | <b>Paradigms Intuiting Abstraction Strategies</b>                                         | <b>10</b> |
| 4.1      | Search Paradigms . . . . .                                                                | 10        |
| 4.2      | Sampling Paradigms . . . . .                                                              | 10        |
| <b>5</b> | <b>Additional Information About Value-Based Abstractions</b>                              | <b>12</b> |
| <b>6</b> | <b>Detailed Descriptions of Ordered Partitioning Schemes for Value Based Abstractions</b> | <b>13</b> |
| 6.0.1    | simpleVB . . . . .                                                                        | 13        |
| 6.0.2    | minVarVB . . . . .                                                                        | 14        |
| 6.0.3    | equalDistVB . . . . .                                                                     | 15        |

|          |                                       |           |
|----------|---------------------------------------|-----------|
| 6.0.4    | equalDistVB2 . . . . .                | 16        |
| 6.0.5    | equalDistVB3 . . . . .                | 17        |
| 6.0.6    | equalDistVB4 . . . . .                | 17        |
| 6.0.7    | randVB . . . . .                      | 18        |
| <b>7</b> | <b>Extended Results</b>               | <b>19</b> |
| 7.1      | Summary Comparison. . . . .           | 19        |
| 7.1.1    | Exact Problems . . . . .              | 19        |
| 7.1.2    | LARGE Problems . . . . .              | 21        |
| 7.2      | Comparison using 100 Samples. . . . . | 23        |
| 7.2.1    | Exact Problems . . . . .              | 23        |
| 7.2.2    | LARGE Problems . . . . .              | 23        |
| 7.3      | Time Series Plot . . . . .            | 24        |
| 7.3.1    | LARGE Problems . . . . .              | 24        |
| <b>8</b> | <b>Additional Results</b>             | <b>28</b> |
| 8.1      | Probe Size . . . . .                  | 28        |
| 8.2      | Abstraction Speed . . . . .           | 28        |

# 1 AOAS BACKGROUND

Taken with permission directly from Kask et al. [2020].

## 1.1 SAMPLE ALGORITHM TRACE

Here we show a trace of abstraction sampling using the AOAS algorithm using an abstraction function that groups AND nodes of the same domain value together in an abstract state.

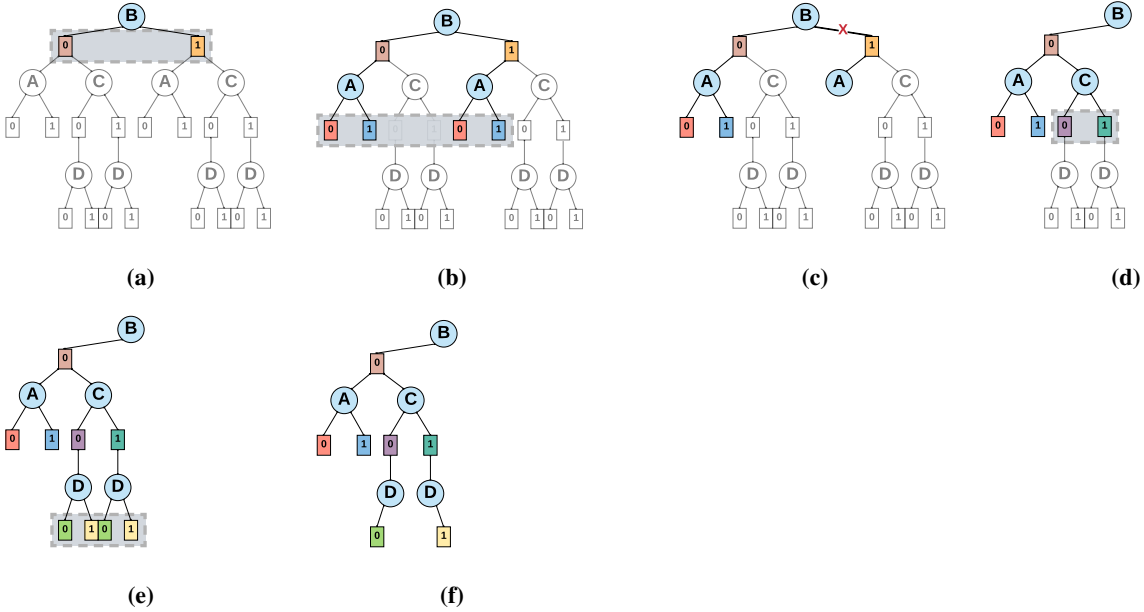

**Figure 1:** From Kask et al. [2020], a sample trace of AOAS following DFS ordering  $B \rightarrow A \rightarrow C \rightarrow D$ . Transparent nodes indicate portions of the reachable search space yet to be explored. Gray boxes indicate nodes considered for abstraction. Nodes with the same domain values (also indicated by the same color) are abstracted into the same abstract state. Only one node of each color is stochastically selected as a representative for its respective abstract state. Step (c) shows an optional pruning step. Step (f) shows the final example probe capturing four full configurations:  $B = 0, A = 0, C = 0, D = 0$ ,  $B = 0, A = 1, C = 0, D = 1$ ,  $B = 0, A = 0, C = 1, D = 1$ ,  $B = 0, A = 1, C = 1, D = 1$ .

Starting with variable  $B$  (Figure 1a), each node belongs to a different abstraction and is therefore kept. Next, we expand to  $A$  and abstract across its nodes (Figure 1b). Not restricted to *proper* abstractions, we partition across *all* nodes of  $A$ , regardless of whether they fall under  $B=0$  or  $B=1$ . We see two nodes in each abstract state (denoted by the red and blue coloring). Next we calculate their respective proposals (line 21). Note that the proposal of each node  $n$  relies on  $r(n)$  (line 15), which captures the values of the nodes in its  $Out(path(n))$ , in this case nodes of  $C$ . Since the nodes of  $C$  have not been expanded yet, we use their heuristic values as an approximation of their values. We then stochastically choose a representative from each abstract state (line 23). Suppose that both red and blue representatives are stochastically chosen from under  $B=0$  (Figure 1c). Since  $A$  has no descendant, we backtrack to  $B$ , updating its node values (line 33) and performing a pruning step (line 31). In pruning, we remove AND nodes of  $B$  that do not extend to AND nodes of  $A$ , and thus prune  $B=1$  (denoted by the red "X" in Figure 1c), in order to ensure formation of proper AND/OR probes. Finally, we expand and abstract  $C$  and  $D$  (Figures 1d-1f). The  $r(n)$  for  $D$ 's nodes is inherited from the  $r(n_C)$  of its respective  $n_C$  parent. We backtrack from  $D$  to the root updating values (no further pruning was necessary). The result is a valid probe (Figure 1f) containing four solutions:  $(B=0, A=0, C=0, D=0)$ ,  $(B=0, A=0, C=1, D=1)$ ,  $(B=0, A=1, C=0, D=0)$ , and  $(B=0, A=1, C=1, D=1)$ . We estimate the partition function by computing  $\hat{Z}(B)$ .

## 1.2 DETAILED ALGORITHM

---

**Algorithm 1: AOAS.**

---

**Input:** Graphical model  $\mathcal{M} = (\mathbf{X}, \mathbf{D}, \Phi)$ , a pseudo tree  $\mathcal{T}$  for  $\mathcal{M}$  rooted at a dummy singleton variable  $D$ , an abstraction function  $a$ , heuristic function  $h$ . For any node  $n$ ,  $g(n)$  = its path cost,  $w(n)$  = its importance weight, and  $\hat{Z}(n)$  = its estimated value (initialized to  $h(n)$ ).  
**Output:**  $\hat{Z}_{\mathcal{M}}$ , an estimate of the partition function of  $\mathcal{M}$

```
1 Function AOAS ( $\mathcal{T}, h, a$ )
2 begin
3    $PROBE \leftarrow n_D, g(n_D), w(n_D), r(n_D), \hat{Z}(n_D) \leftarrow 1$ 
4    $STACK \leftarrow push(\text{empty stack}, D)$ 
5   while  $STACK$  is not empty do
6      $X \leftarrow top(STACK)$ 
7     if  $X$  has unvisited children in  $\mathcal{T}$  then
8        $Y \leftarrow$  the next unvisited child of  $X$ 
9       foreach  $n_X \in PROBE$  do
10         $PROBE \leftarrow PROBE$  expanded from  $n_X$  to  $Y$ 
11         $F'_Y \leftarrow$  newly added AND nodes of  $Y \in PROBE$ 
12        foreach  $n_Y \in F'_Y$  do
13           $w(n_Y) \leftarrow w(n_X)$ 
14           $g(n_Y) \leftarrow g(n_X) \cdot c(n_Y)$ 
15           $r(n_Y) \leftarrow r(n_X) \cdot \prod_{\{S \neq Y \in ch_{\mathcal{T}}(X)\}} \hat{V}(S_{n_X})$ 
16        end
17      end
18       $A \leftarrow \{A_i \mid A_i = \{n_Y \in PROBE \mid a(n) = i\}\}$ 
19      foreach  $A_i \in A$  do
20        foreach  $n \in A_i$  do
21           $p(n) \leftarrow \frac{w(n) \cdot g(n) \cdot h(n) \cdot r(n)}{\sum_{m \in A_i} w(m) \cdot g(m) \cdot h(m) \cdot r(m)}$ 
22        end
23         $n_{Y_i} \propto_p A_i$ ; // randomly select
24         $w(n_{Y_i}) \leftarrow w(n_{Y_i}) / p(n_{Y_i})$ 
25         $\hat{Z}(n_{Y_i}) \leftarrow 1$ 
26         $PROBE \leftarrow PROBE \setminus A_i \cup \{n_{Y_i}\}$ 
27      end
28       $push(STACK, Y)$ 
29    else
30       $pop(STACK), W \leftarrow top(STACK)$ 
31       $PROBE \leftarrow PROBE$  s.t. all  $n_W$  without descendants are pruned
32      foreach  $n_W$  in  $PROBE$  do
33         $\hat{Z}(n_W) \leftarrow \hat{Z}(n_W) \cdot \sum_{n_X \leftarrow child(n_W)} \hat{Z}(n_X) \cdot c(n_X) \cdot \frac{w(n_X)}{w(n_W)}$ 
34      end
35      if  $X = D$  then  $\hat{Z}_{\mathcal{M}} = \hat{Z}(D)$ ;
36    end
37  end
38  return  $\hat{Z}_{\mathcal{M}}$ 
39 end
```

---

## 2 PROBE SIZE VARIABILITY

Even with the same abstraction function and granularity (ie. allowed number of abstract states per level), probe sizes can vary greatly. One reason for this is due to abstractions causing nodes from certain branches of the probe to be replaced by representative from other branch, and thus the current branch will no longer be extended. We provide a paired example in Figure 3 and Figure 4 where in both cases the probes are constructed according to the pseudo tree shown in Figure 2, an abstraction function is used that groups nodes with the same domain value together (indicated by yellow coloring for grouping of nodes with a domain value of 0 and blue coloring grouping nodes together that have domain value of 1) is used, and the abstraction granularity is set to  $nAbs = 2$  (meaning that nodes are abstracted into at most two abstract states).

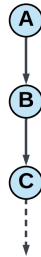

**Figure 2:** A linear psuedo tree.

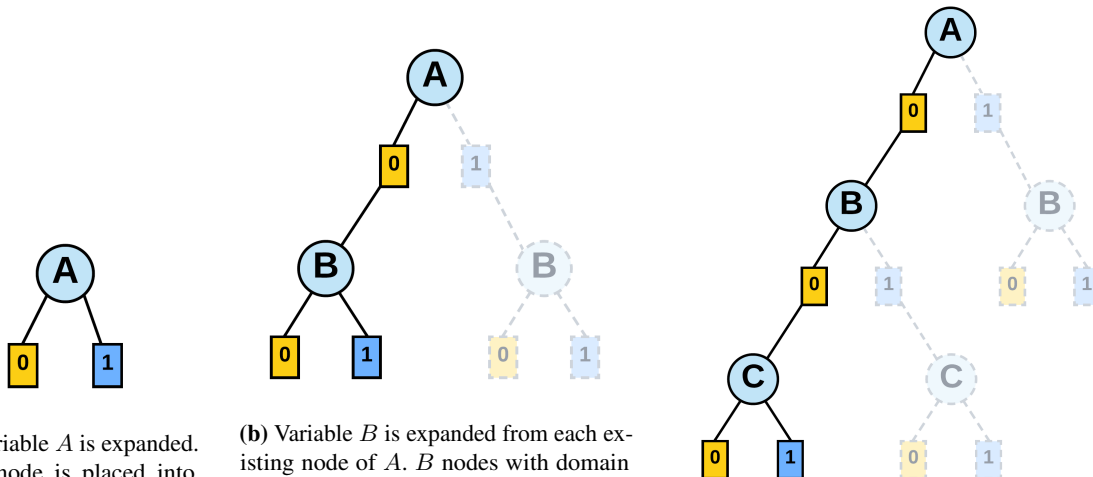

(a) Variable  $A$  is expanded. Each node is placed into a separate abstract state and each is selected to represent their respective abstract state.

(b) Variable  $B$  is expanded from each existing node of  $A$ .  $B$  nodes with domain value 0 are joined together into an abstract state (yellow);  $B$  nodes with domain value 1 constitute a different abstract state, the corresponding node underneath the branch of  $A \leftarrow 0$  is stochastically selected as the representative. As there are no selected representatives underneath the branch of  $A \leftarrow 1$ , those nodes will no longer be extended (and can be pruned).

(c) Variable  $C$  is expanded from each representative node of  $B$ .  $C$  nodes with domain value 0 are joined together into an abstract state (yellow);  $C$  nodes with domain value 1 constitute a different abstract state (blue). For each resulting abstract state, the corresponding node underneath the branch of  $A \leftarrow 0, B \leftarrow 0$  is stochastically selected as the representative. As there are no selected representatives underneath the branch of  $A \leftarrow 0, B \leftarrow 1$ , those nodes will no longer be extended (and can be pruned).

**Figure 3:** An example of a "skewed" probe construction following the pseudo tree in Figure 2, using an abstraction function that groups nodes of the same domain value into the same abstract state, and using a granularity of  $nAbs = 2$ . At each level, representatives of all abstract states are chosen under the same single branch, thus only extending only one path in the probe.

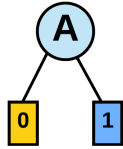

(a) Variable  $A$  is expanded. Each node is placed into a separate abstract state and each is selected to represent their respective abstract state.

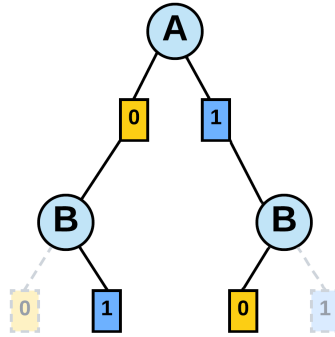

(b) Variable  $B$  is expanded from each existing node of  $A$ .  $B$  nodes with domain value 0 are joined together into an abstract state (yellow);  $B$  nodes with domain value 1 constitute a different abstract state (blue). The stochastically selected representative from the  $B = 1$  abstract state ends up under the  $A \leftarrow 0$  branch while the representative from the  $B = 0$  abstract state is selected from under  $A \leftarrow 1$ . As a result, both  $A \leftarrow 0$  and  $A \leftarrow 1$  branches have an extension to a node from  $B$  and will continue to be extended.

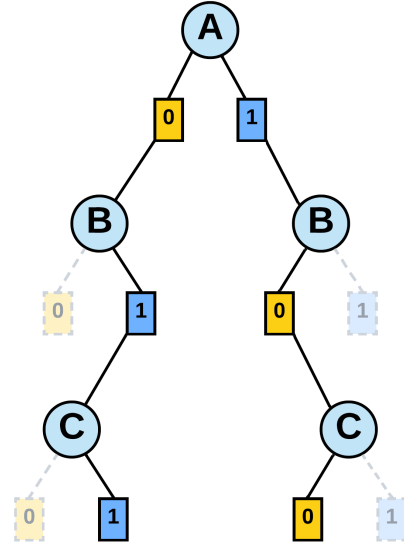

(c) Variable  $C$  is expanded from each existing node of  $B$ .  $C$  nodes with domain value 0 are joined together into an abstract state (yellow);  $C$  nodes with domain value 1 constitute a different abstract state (blue). The stochastically selected representative from the  $C = 1$  abstract state ends up under the  $A \leftarrow 0, B \leftarrow 1$  branch while the representative from the  $C = 0$  abstract state is selected from under  $A \leftarrow 1, B \leftarrow 0$ . As a result, both  $A \leftarrow 0, B \leftarrow 1$  and  $A \leftarrow 1, B \leftarrow 0$  branches have an extension to a node from  $C$  and will continue to be extended.

**Figure 4:** An example of a "balanced" probe construction following the pseudo tree in Figure 2, using an abstraction function that groups nodes of the same domain value into the same abstract state, and using a granularity of  $n_{Abs} = 2$ . At each level, representatives of all abstract states are chosen under the same single branch, thus only extending only one path in the probe.

### 3 EXACT ABSTRACTION PROOFS

#### Required Definitions.

**Definition 3.0.0.1** (Abstraction Function  $h(n)$  vs.  $Z(n)$  Proportionality)

An abstraction function  $a(n)$  maintains  $h(n)$  vs.  $Z(n)$  proportionality if, for every abstract state  $A_i$  formed by  $a(n)$ ,  $\forall n \in A_i, h(n) = \alpha Z(n)$ , for some constant  $\alpha$  specific to  $A_i$ .

**Definition 3.0.0.2** (Abstraction Function  $h(n)r(n)$  vs.  $Z(n)R(n)$  Proportionality)

An abstraction function  $a(n)$  maintains  $h(n)r(n)$  vs.  $Z(n)R(n)$  proportionality if, for every abstract state  $A_i$  formed by  $a(n)$ ,  $\forall n \in A_i, h(n)r(n) = \alpha Z(n)R(n)$ , for some constant  $\alpha$  specific to  $A_i$ .

**Definition 3.0.0.3** (Exact Abstraction Function)

An abstraction function  $a(\cdot)$  is exact for an abstraction sampling algorithm, AS, if use of  $a(\cdot)$  with AS always leads to AS estimates having zero variance and  $\hat{Z} = Z$  for every AS probe.

#### 3.1 ORAS

**Theorem 3.1.0.1** (ORAS Exact Abstractions from  $h(n)$  vs.  $Z(n)$  Proportionality)

If an abstraction function  $a(\cdot)$  maintains  $h(n)$  vs.  $Z(n)$  Proportionality, then it is an exact abstraction function for ORAS.

*Proof.* We know that if we were to use exhaustive search, we would arrive at the true  $Z$  value. We use a proof by induction that assumes that after each abstraction step we will compute the rest of the probe exactly using exhaustive search. Thus, if abstractions are performed layer by layer down from the root, after each abstraction we know that  $Z(n')$  will be computed exactly for the selected node  $n'$ .

We denote the estimate that would be generated by a probe constructed after  $t$  time steps as  $\hat{Z}^{(t)}(PROBE)$ . (As we will describe, each time step will correspond to an abstraction step). As a base case,  $\hat{Z}^{(t=0)}(PROBE) = Z$  since all values will be computed exactly via exhaustive search. In the inductive step, we will show that after each time step  $t$ , if instead of using exhaustive search immediately, we first perform an abstraction on the current level of the probe, the resulting estimate of the newly abstracted probe  $\hat{Z}^{(t+1)}(PROBE)$  will remain unchanged. Namely, we will show that

$$\hat{Z}^{(t)}(PROBE) - \hat{Z}^{(t+1)}(PROBE) = 0$$

This shows that the abstractions maintain exactness of the probe's estimate.

Starting from the left hand side

$$LHS = \hat{Z}^{(t)}(PROBE) - \hat{Z}^{(t+1)}(PROBE)$$

We note the difference in the overall probe estimates during an Abstraction Sampling is due to the change in the probe estimate that results from each individual abstraction step (namely selection and reweighing of a representative node  $n'$  from an abstract state  $A_i$ ). Thus for our time steps, we will focus on the difference in value resulting from a single arbitrary abstraction step.

$$= \sum_{n \in A_i} w^{(t)}(n)g(n)Z(n) - w^{(t+1)}(n')g(n')Z(n')$$

Above, the left term shows the contribution to the partition function due to nodes of abstract state  $A_i$  (still assuming we will perform exhaustive search below each one), and the right term is the contribution of a selected node  $n'$  after abstraction (note the adjustment to the selected node's weight).

Using the fact that  $w^{(t+1)}(n') = \frac{w^{(t)}(n')}{p(n')}$  (from the importance weight modification), we now get

$$= \sum_{n \in A_i} w^{(t)}(n)g(n)Z(n) - \frac{w^{(t)}(n')}{p(n')}g(n')Z(n')$$

(Note that  $p(n')$  cannot be zero, otherwise  $n'$  would not have been selected).

Noting that for  $p(n') = \frac{w^{(t)}(n')g(n')h(n')}{\sum_{n \in A_i} w^{(t)}(n)g(n)h(n)}$  and substituting we get

$$\begin{aligned} &= \sum_{n \in A_i} w^{(t)}(n)g(n)Z(n) \\ &\quad - w^{(t)}(n')g(n')Z(n') \frac{\sum_{n \in A_i} w^{(t)}(n)g(n)h(n)}{w^{(t)}(n')g(n')h(n')} \\ &= \sum_{n \in A_i} w^{(t)}(n)g(n)Z(n) - \frac{Z(n')}{h(n')} \sum_{n \in A_i} w^{(t)}(n)g(n)h(n) \end{aligned}$$

Now, per our assumption,  $\forall n \in A_i$ , let  $h(n) = \alpha Z(n)$ , where  $\alpha$  is the proportionality constant by which  $h(n)$  differs from  $Z(n)$ . Then

$$\begin{aligned} &= \sum_{n \in A_i} w^{(t)}(n)g(n)Z(n) - \frac{Z(n')}{\alpha Z(n')} \sum_{n \in A_i} w^{(t)}(n)g(n) \alpha Z(n) \\ &= \sum_{n \in A_i} w^{(t)}(n)g(n)Z(n) - \frac{\alpha}{\alpha} \sum_{n \in A_i} w^{(t)}(n)g(n)Z(n) \\ &= \sum_{n \in A_i} w^{(t)}(n)g(n)Z(n) - \sum_{n \in A_i} w^{(t)}(n)g(n)Z(n) \\ &= 0 = RHS \end{aligned}$$

□

□

### 3.2 AOAS

**Theorem 3.2.0.1** (AOAS Exact Abstractions from  $h(n)r(n)$  vs.  $Z(n)R(n)$  Proportionality)

*If an abstraction function  $a(\cdot)$  maintains  $h(n)r(n)$  vs.  $Z(n)R(n)$  Proportionality, then it is an exact abstraction function for AOAS.*

*Proof.* We know that if we were to use exhaustive search, we would arrive at the true  $Z$  value. We use a proof by induction that assumes that after each abstraction step we will compute the rest of the probe exactly using exhaustive search. Thus, if abstractions are performed layer by layer down from the root, after each abstraction we know that  $Z(n')$  will be computed exactly for the selected node  $n'$ . We also assume that,  $R(n)$  for every node will be computed exactly. This assumption holds true before we perform any abstractions (as everything is computed exactly via exhaustive search) and continues to hold if we can show that, after each abstraction step, the resulting estimates remains unchanged (and thus remains exact).

We denote the estimate that would be generated by a probe constructed after  $t$  time steps as  $\hat{Z}^{(t)}(PROBE)$ . (As we will describe, each time step will correspond to an abstraction step). As a base case,  $\hat{Z}^{(t=0)}(PROBE) = Z$  since all values will be computed exactly via exhaustive search. In the inductive step, we will show that after each time step  $t$ , if instead of using exhaustive search immediately, we first perform an abstraction on the current level of the probe, the resulting estimate of the newly abstracted probe  $\hat{Z}^{(t+1)}(PROBE)$  will remain unchanged. Namely, we will show that

$$\hat{Z}^{(t)}(PROBE) - \hat{Z}^{(t+1)}(PROBE) = 0$$

This shows that the abstractions maintain exactness of the probe's estimate.

Starting from the left hand side

$$LHS = \hat{Z}^{(t)}(PROBE) - \hat{Z}^{(t+1)}(PROBE)$$

We note the difference in the overall probe estimates during an Abstraction Sampling is due to the change in the probe estimate that results from each individual abstraction step (namely due to the selection and reweighing of a representative node  $n'$  from an abstract state  $A_i$ ). Thus for our time steps, we will focus on the difference in value resulting from a single arbitrary abstraction step.

$$= \sum_{n \in A_i} w^{(t)}(n)g(n)Z(n)R(n) - w^{(t+1)}(n')g(n')Z(n')R(n')$$



Above, the left term shows the contribution to the partition function due to nodes of abstract state  $A_i$  (still assuming we will perform exhaustive search below each one), and the right term is the contribution of a selected node  $n'$  after abstraction (note the adjustment to the selected node's weight).

Using the fact that  $w^{(t+1)}(n') = \frac{w^{(t)}(n')}{p(n')}$  (from the importance weight modification), we now get

$$= \sum_{n \in A_i} w^{(t)}(n)g(n)Z(n)R(n) - \frac{w^{(t)}(n')}{p(n')}g(n')Z(n')R(n')$$

(Note that  $p(n')$  cannot be zero, otherwise  $n'$  would not have been selected).

Noting that for  $p(n') = \frac{w^{(t)}(n')g(n')h(n')r(n')}{\sum_{n \in A_i} w^{(t)}(n)g(n)h(n)r(n)}$  and substituting we get

$$\begin{aligned} &= \sum_{n \in A_i} w^{(t)}(n)g(n)Z(n)R(n) \\ &\quad - w^{(t)}(n')g(n')Z(n')R(n') \frac{\sum_{n \in A_i} w^{(t)}(n)g(n)h(n)r(n)}{w^{(t)}(n')g(n')h(n')r(n')} \\ &= \sum_{n \in A_i} w^{(t)}(n)g(n)Z(n)R(n) \\ &\quad - \frac{Z(n')R(n')}{h(n')r(n')} \sum_{n \in A_i} w^{(t)}(n)g(n)h(n)r(n) \end{aligned}$$

Now, per our assumption,  $\forall n \in A_i$ , let  $h(n)r(n) = \alpha Z(n)R(n)$ , where  $\alpha$  is the proportionality constant by which  $h(n)r(n)$  differs from  $Z(n)R(n)$ . Then

$$\begin{aligned} &= \sum_{n \in A_i} w^{(t)}(n)g(n)Z(n)R(n) \\ &\quad - \frac{Z(n')R(n')}{\alpha Z(n')R(n')} \sum_{n \in A_i} w^{(t)}(n)g(n) \alpha Z(n)R(n) \\ &= \sum_{n \in A_i} w^{(t)}(n)g(n)Z(n)R(n) \\ &\quad - \frac{\alpha}{\alpha} \sum_{n \in A_i} w^{(t)}(n)g(n)Z(n)R(n) \\ &= \sum_{n \in A_i} w^{(t)}(n)g(n)Z(n)R(n) - \sum_{n \in A_i} w^{(t)}(n)g(n)Z(n)R(n) \\ &= 0 = RHS \end{aligned}$$

□

□

## 4 PARADIGMS INTUITING ABSTRACTION STRATEGIES

Next we review concepts from search and sampling that offer paradigms from which we draw ideas for abstraction functions.

### 4.1 SEARCH PARADIGMS

In [tree] search, one can merge nodes that have the same value to produce a more efficient graph search [Mateescu et al. \[2008\]](#). Abstraction functions by [Broka et al. \[2018\]](#) focused on this paradigm and approached it by using the concept of a node's context - the assignments to the smallest subset of a node's ancestor variables that dictates its value. Due to the potentially large context size for variables, and consequently the exponentially high number of combinations of assignments to the context, the full context of variables could not be used in most cases. [Broka et al. \[2018\]](#) resolved this by creating two context-based abstraction functions that were relaxed to allow nodes with different contexts to be grouped in the same abstract state. However, sharing the same partial context does not necessarily imply the same, nor even similar, node values. Our new Heuristic-Based abstractions hope to provide more accurate abstractions based on the same ideology.

### 4.2 SAMPLING PARADIGMS

Consider wanting to compute the  $\mathbb{E}_{p^*}[f(x)] = \sum_x f(x)p^*(x)$  for a distribution  $p^*(\cdot)$  over a variable  $X$  that is difficult to sample from but easy to evaluate, and given a positive value function  $f(x)$ . Using a proposal distribution  $p(\cdot)$  that is easy to sample from, and noticing the equivalency of the target quantity with  $\sum_x \frac{f(x)p^*(x)}{p(x)}p(x)$ , we can estimate the quantity by importance sampling by drawing  $m$  samples to estimate the equivalent quantity  $\mathbb{E}_p[f(x) \frac{p^*(x)}{p(x)}] \approx \frac{1}{m} \sum_{j=1}^m f(x^{(j)}) \frac{p^*(x^{(j)})}{p(x^{(j)})}$ ,  $x^{(j)} \stackrel{\text{iid}}{\sim} p$ . It is well known that importance sampling achieves zero variance when 1)  $p(x) = 0 \implies p^*(x) = 0$ , and 2) otherwise  $p(x)$  is proportional to  $p^*(x)f(x)$  [Kahn and Marshall \[1953\]](#), [Owen \[2013\]](#).

**Lemma 4.2.0.1** (Importance Sampling Exact Proposal Based on Proportionality with Target Distribution)

*Given a distribution  $p^*(\cdot)$  over a variable  $X$  that is easy to evaluate, and given a positive value function  $f(x)$ , importance sampling to estimate  $\mathbb{E}_{p^*}[f(x)]$  achieves zero variance when using a proposal function  $p(\cdot)$  such that 1)  $p(n) = 0 \implies p^*(n)f(n) = 0$ , and 2)  $p(n) \propto p^*(n)f(n)$ , otherwise.*

Note that we can also use importance sampling to simply compute  $\sum_x f(x) = \sum_x \frac{f(x)}{p(x)}p(x) = \mathbb{E}_p[\frac{f(x)}{p(x)}] \approx \frac{1}{m} \sum_{j=1}^m \frac{f(n^{(j)})}{p(n^{(j)})}$ ,  $x^{(j)} \stackrel{\text{iid}}{\sim} p$ . Note that the partition function over a graphical model,  $Z = \sum_{\mathbf{x}} \mathbf{F}(\mathbf{x})$ ,  $\mathbf{F}(\mathbf{x}) = \prod_{f \in \mathbf{F}} f(x)$ , has the form of this task.

In fact, expanding an AND/OR search tree level-by-level, the partition function  $Z$  with respect to the nodes  $n$  at any variable  $X$  can be written as  $Z = \sum_n g(n)Z(n)R(n)$ . Thus, using a proposal  $p(\cdot)$  to perform importance sampling at any level we could instead estimate

$$Z = \sum_n g(n)Z(n)R(n) = \sum_x \frac{g(n)Z(n)R(n)}{p(n)}p(n) \quad (1)$$

$$\approx \frac{1}{m} \sum_{j=1}^m \frac{g(n^{(j)})Z(n^{(j)})R(n^{(j)})}{p(n^{(j)})}, n^{(j)} \stackrel{\text{iid}}{\sim} p \quad (2)$$

Thus, sampling at any level would also allow for zero variance / exact computation if similarly  $p(n) \propto g(n)Z(n)R(n)$ .

Note that in Abstraction Sampling each abstract state involves a node selection procedure analogous to importance sampling and that AOAS uses a proposal  $p(n) \propto g(n)h(n)r(n)$ .  $g(n)$  can always be evaluated exactly. Then assuming that  $h(n) = 0 \implies Z(n) = 0$  and  $r(n) = 0 \implies R(n) = 0$ , it naturally follows that designing each abstract states  $A_i$  such that  $\forall n \in A_i, h(n)r(n) = \alpha g(n)Z(n)R(n)$ , for some constant  $\alpha$ , we similarly achieve zero variance.

**Definition 4.2.0.1** (Abstraction Function  $h(n)r(n)$  vs.  $Z(n)R(n)$  Proportionality)

*An abstraction function  $a(n)$  maintains  $h(n)r(n)$  vs.  $Z(n)R(n)$  proportionality if, for every abstract state  $A_i$  formed by  $a(n)$ ,  $\forall n \in A_i, h(n)r(n) = \alpha Z(n)R(n)$ , for some constant  $\alpha$  specific to  $A_i$ .*

**Definition 4.2.0.2** (Exact Abstraction Function)

*An abstraction function  $a(\cdot)$  is exact for an abstraction sampling algorithm, AS, if use of  $a(\cdot)$  with AS always leads to AS estimates having zero variance and  $\hat{Z} = Z$  for every AS probe.*

Thus, we can say:

**Theorem 4.2.0.2** (AOAS Exact Abstractions from  $h(n)r(n)$  vs.  $Z(n)R(n)$  Proportionality)

*If an abstraction function  $a(\cdot)$  maintains  $h(n)r(n)$  vs.  $Z(n)R(n)$  Proportionality, then it is an exact abstraction function for AOAS. (Proof in Supplemental Materials)*

Normally we neither have access to the proportionality constant  $\alpha$  or even know whether nodes have the same  $\alpha$ . However one idea is to use the magnitude of  $h(n)r(n)$  itself as a heuristic for similarities in  $\alpha$ . This drives the intuition for a new HR-Based class of abstractions.

Also from a sampling perspective, [Rizzo \[2007\]](#) showed the following about stratified importance sampling when sampling from equal area strata under the proposal:

**Proposition 4.2.0.3** (Stratified Importance Sampling Variance Reduction)

*Suppose that  $M = mk$  is the number of replicates for an importance sampling estimator  $\hat{\theta}^I$ , and  $\hat{\theta}^{\hat{S}I}$  is a stratified importance sampling estimator, with estimates  $\hat{\theta}_j$  for  $\theta_j$  on the individual strata, each with  $m$  replicates. If  $Var(\hat{\theta}^I) = \sigma^2/M$  and  $Var(\hat{\theta}_j) = \sigma_j^2/m$ ,  $j = 1, \dots, k$ , then*

$$\sigma^2 - k \sum_{j=1}^k \sigma_j^2 \geq 0, \quad (3)$$

*with equality if and only if  $\theta_1 = \dots = \theta_k$ . Hence stratification never increases variance, and there exists a stratification that reduces the variance except when [the proposal function]  $g(x)$  is constant.*

Two takeaways from this proposition are that 1) we can achieve variance reduction with respect to importance sampling (analogous to Abstraction Sampling with all nodes placed into a single abstract state) by stratifying into equal area strata under the proposal, and 2) reducing the variance of each strata  $\sigma_j^2$  leads to greater variance reduction. These will help drive the intuition for a new Q-Based abstraction class, as well as motivate several new partitioning schemes.

## 5 ADDITIONAL INFORMATION ABOUT VALUE-BASED ABSTRACTIONS

As described in the main paper, value-based abstraction functions consist of two parts: (1) a value function  $\mu : n \rightarrow \mathbb{R}$  that assigns a real value on a positive scale to nodes  $n$  that are to be abstracted, and (2) a partitioning scheme that then abstracts nodes based on  $\mu(n)$ . And because  $\mu(n)$  are values on a positive scale (implying semantics between smaller vs. larger values), the partitioning schemes can be designed to partition the nodes in a way that maintains an ordering of  $\mu(n)$ . This results in what we call value-based ordered abstractions.

---

**Algorithm 2:** General Value-Ordered Abstraction Function Scheme

---

**input** : A set of nodes  $n$  to be partitioned into abstract states; an abstraction value function  $\mu(\cdot)$ ; a parameter  $nAbs$  bounding the number of abstract states; a partitioning function  $\Psi_o(\cdot)$  that partitions  $n$  into abstract states such that nodes are ordered by  $\mu(n)$  according to sort-order  $o$

**output** : Nodes  $n$  partitioned into abstract states  $A = \{A_i \mid i \leq nAbs\}$  such that sort order  $o$  of  $\mu(n)$  is maintained across all  $A_i$ .

```
1 begin
2   if  $|n| \leq nAbs$  then
3      $A = \{\{n\} \mid n \in n\}$ 
4   else
5      $A = \Psi_o(n, \mu, nAbs)$ 
6   return  $A$ 
7 end
```

---

## 6 DETAILED DESCRIPTIONS OF ORDERED PARTITIONING SCHEMES FOR VALUE BASED ABSTRACTIONS

We now present seven schemes, each defined by a unique sort order  $o$  and partition strategy  $\Psi$  combination. Each scheme uses a different method to partition nodes into abstract states keeping the nodes in sort order according to  $o$ . With a provided value function  $\mu(\cdot)$ , each scheme can be used to form an ordered value abstraction function. In addition to defining each scheme, we also describe the motivation behind its creation.

**Running Example** As we motivate and describe the schemes, we will also provide an example of abstract states that would result from partitioning the following nodes:

$$\{1.0, 1.1, 1.2, 1.3, 1.4, 1.5, 10, 100\} \quad (4)$$

into  $nAbs = 4$  abstract states by each of partitioning schemes that will be presented.

### 6.0.1 simpleVB

$\Psi_{simpleVB}$  (Algorithm 3)

---

**Algorithm 3:**  $\Psi_{simpleVB}$

---

**input** :A set of nodes  $\mathbf{n}$  to be partitioned into  $nAbs$  abstract states; a value function  $\mu(\cdot)$

**output** : $\mathbf{n}$  partitioned into abstract states<sup>1</sup>  $\mathbf{A} = \{\mathbf{A}_i \mid i \in \{1, \dots, nAbs\}\}$  such that  $\forall \mathbf{A}_i, \mathbf{A}_j \in \mathbf{A}, -1 \leq |\mathbf{A}_i| - |\mathbf{A}_j| \leq 1$

```

1 begin
2    $baseCardinality \leftarrow \lfloor \frac{|\mathbf{n}|}{nAbs} \rfloor$ 
3    $extras \leftarrow |\mathbf{n}| \bmod nAbs$ 
4    $\mathbf{n}^* \leftarrow SORT(\mathbf{n}, \mu, \text{low-to-high})$ 
5    $j_{begin} \leftarrow 1$ 
6   foreach  $i \leftarrow 1, \dots, nAbs$  do
7     if  $extras > 0$  then
8        $j_{end} \leftarrow j_{begin} + baseCardinality$ 
9        $extras \leftarrow extras - 1$ 
10    else
11       $j_{end} \leftarrow j_{begin} + baseCardinality - 1$ 
12       $\mathbf{A}_i \leftarrow \{n_{j_{begin}}^*, \dots, n_{j_{end}}^*\}$ 
13       $j_{begin} \leftarrow j_{end} + 1$ 
14    end
15   $\mathbf{A} \leftarrow \cup_{i=1}^{nAbs} \mathbf{A}_i$ 
16  return  $\mathbf{A}$ 
17 end

```

---

The simpleVB (simple value-based) scheme follows the motivation of grouping nodes of similar value in the same abstract state by a simple 2-step method: 1) first, nodes are ordered by their heuristic value (low to high), and 2) next the ordered nodes are partitioned into [approximately] equal cardinality abstract states.

#### **Time Complexity.**

Partitioning is achieved via one pass through  $|\mathbf{n}^*|$  leading to  $\mathcal{O}(|\mathbf{n}| \log |\mathbf{n}|)$  time complexity due to sorting.

#### **Space Complexity.**

No more than linear space is required.  $\mathcal{O}(|\mathbf{n}|)$

#### **Result on Running Example.**

$\{1.0, 1.1\}, \{1.2, 1.3\}, \{1.4, 1.5\}, \{10, 100\}$

Through its simplicity, this method aims to leverage speed allowing for abstractions to be formed much quicker leading to greater number of samples.

---

<sup>1</sup>Such that nodes maintain sort order  $o$  across all abstract states.

## 6.0.2 minVarVB

$$\Psi = \Psi_{\text{minVarVB}} \text{ (Algorithm 4)}$$

---

### Algorithm 4: $\Psi_{\text{minVarVB}}$

---

**input** : A set of nodes  $\mathbf{n}$  to be partitioned into  $nAbs$  abstract states; a value function  $\mu(\cdot)$

**output** :  $\mathbf{n}$  partitioned into abstract states<sup>1</sup>  $\mathbf{A} = \{\mathbf{A}_i \mid i \in \{1, \dots, nAbs\}\}$  satisfying  $\min \sum_{\mathbf{A}_i \in \mathbf{A}} Var(\mathbf{A}_i, v)$

```

1 begin
2    $\mathbf{A} = \text{WardsMethod}(\mathbf{n}, nAbs, \mu(\cdot), \text{Euclidian distance})$ 
3   return  $\mathbf{A}$ 
4 end
```

---

As mentioned in Section 4.2, Proposition 4.2.0.3, [Rizzo \[2007\]](#) showed that in stratified importance sampling minimizing variance of the estimates within individual strata can lead to a reduction in overall variance.

The minVarVB scheme was designed based on this intuition. The scheme uses Ward's Minimum Variance Hierarchical Clustering (or Ward's Method, for short) [Ward \[1963\]](#) to group nodes into a  $nAbs$  abstract states so as to minimize variance within each abstract state with respect to the provided value function  $\mu(\cdot)$ .

Ward's Minimum Variance Hierarchical Clustering is an agglomerative hierarchical clustering algorithm designed to create a dendrogram by iteratively merging clusters. The primary objective is to minimize the total within-cluster variance. Ward's method works as outlined in Algorithm 5.

---

### Algorithm 5: Ward's Method

---

1. **Initialization:** Treat each data point as an individual cluster. Assign each cluster a label or identifier.
  2. **Compute Pairwise Distances:** Calculate the pairwise distances between all clusters. Various distance metrics can be used, such as Euclidean distance.
  3. **Cluster Merging Iteration:**
    - (a) Identify the pair of clusters  $C_i$  and  $C_j$  that, when merged into a new cluster  $C_{ij}$ , results in the smallest increase in the overall within-cluster variance. This is determined using the formula:
 
$$\Delta Var = Var(C_{ij}) - (Var(C_i) + Var(C_j))$$
 where  $Var(C_{ij})$  is the variance of the merged cluster, and  $Var(C_i)$  and  $Var(C_j)$  are the variances of clusters  $C_i$  and  $C_j$ , respectively.
    - (b) Update distance measures between the newly merged cluster and all other clusters.
  4. **Repeat:** Repeat steps 2-3 until the desired number of clusters is achieved.
- 

Ward's Method can be combined with Lance-Williams linear distance updates [Lance and Williams \[1967\]](#) to increase efficiency. Lance-Williams linear distance updates, in the context of agglomerative clustering, refer to the formula used to calculate the distance between clusters as they are merged during the hierarchical clustering process. The general form of Lance-Williams distance updates can be expressed as follows:

$$d_{(ij)k} = \alpha_i d_{ik} + \alpha_j d_{jk} + \alpha d_{ij} + \gamma |d_{ik} - d_{jk}| \quad (5)$$

where:

- $d_{ij}$ ,  $d_{ik}$ , and  $d_{jk}$  are the pair-wise distances between clusters  $C_i$ ,  $C_j$ , and  $C_k$
- $d_{(ij)k}$  is the distance between the newly merged cluster  $C_i \cup C_j$  and cluster  $C_k$
- $\alpha_i$ ,  $\alpha_j$ ,  $\alpha$ , and  $\gamma$  are coefficients that depend on the linkage criterion used

In the case of Ward's method, the coefficients are specific to the minimization of within-cluster variance and are calculated

as follows:

$$\begin{aligned}
\alpha_i &= \frac{|C_i| + |C_k|}{|C_i| + |C_j| + |C_k|} \\
\alpha_j &= \frac{|C_j| + |C_k|}{|C_i| + |C_j| + |C_k|} \\
\alpha &= -\frac{|C_k|}{|C_i| + |C_j| + |C_k|} \\
\gamma &= 0
\end{aligned} \tag{6}$$

(The inclusion of  $\gamma$  provides additional flexibility in the more general case, adjusting the distance updates based on the specific clustering criterion being used).

### **Time Complexity.**<sup>2</sup>

The choice of clusters to merge generally leads to having a  $\mathcal{O}(|\mathbf{n}|^3)$  time complexity due to the need to compare pair-wise distances between all clusters at each iteration. However, in the case where nodes are distributed linearly in one dimension, use of a priority queue, and using Lance-Williams distance updates, the time complexity is can be reduced to  $\mathcal{O}(|\mathbf{n}|^2)$ .

### **Space Complexity.**<sup>2</sup>

The space complexity is implementation dependent, with most time-efficient variants making use of a distance matrix leading to  $\mathcal{O}(|\mathbf{n}|^2)$  space complexity.

### **Result on Running Example.**

{1.0, 1.1, 1.2}, {1.3, 1.4, 1.5}, {10}, {100}

In contrast to simpleVB, minVarVB places considerable resources into computing abstractions, leading to fewer samples, but with potentially better estimates with an appropriate value function  $\mu(\cdot)$ .

## **6.0.3 equalDistVB**

$\Psi_{equalDistVB}$  (Algorithm 6)

---

### **Algorithm 6:** $\Psi_{equalDistVB}$

---

**input** : A set of nodes  $\mathbf{n}$  to be partitioned into  $nAbs$  abstract states; a value function  $\mu(\cdot)$

**output** : With  $\mu(\mathbf{A}_1, \dots, i) = (\sum_{j=1}^i \sum_{n' \in \mathbf{A}_j} \mu(n'), n_{\mathbf{A}_i}^{last}$  be the last node in  $\mathbf{A}_i$ , and  $\mathcal{Q}_i = \frac{i \cdot \sum_{n \in \mathbf{n}^*} \mu(n)}{nAbs}$ ,  $\mathbf{n}$  partitioned into abstract states<sup>1</sup>  $\mathbf{A} = \{\mathbf{A}_i \mid i \in \{1, \dots, nAbs\}\}$  such that for  $i = 1, \dots, nAbs$  in order,  $(\mu(\mathbf{A}_1, \dots, i) \geq \mathcal{Q}_i) \wedge ((\mathbf{A}_i = \{\}) \vee (\mu(\mathbf{A}_1, \dots, i) - \mu(n_{\mathbf{A}_i}^{last}) < \mathcal{Q}_i))$

```

1 begin
2    $\mathbf{n}^* \leftarrow SORT(\mathbf{n}, \mu, \text{low-to-high})$ 
3    $j \leftarrow 1$ 
4   foreach  $i \leftarrow 1, \dots, nAbs$  do
5      $\mathbf{A}_i \leftarrow \{\}$ 
6     while  $\mu(\mathbf{A}_1, \dots, i) < \mathcal{Q}_i$  do
7        $\mathbf{A}_i \leftarrow \mathbf{A}_i \cup \{n_j^*\}$ 
8        $j \leftarrow j + 1$ 
9     end
10  end
11   $\mathbf{A} \leftarrow \cup_{i=1}^{nAbs} \mathbf{A}_i$ 
12  return  $\mathbf{A}$ 
13 end

```

---

In sampling it is generally beneficial to predominantly sample high impact regions of the search/sampling space. Allowing the provided value function  $\mu(\cdot)$  to serve as a heuristic of nodes that are part of these high impact spaces, equalDistVB attempts to balance this intuition with the notion of variance reduction from minVarVB in attempts to group fewer predicted high impact nodes together in abstract states and allowing for the predicted lower impact nodes to be part of larger abstract states. Also inspired by the simplicity of simpleVB, the scheme works by greedily adding nodes in value order (low to high) into abstract state  $\mathbf{A}_i$  until the total sum of node values from  $\mathbf{A}_1, \dots, \mathbf{A}_i$  reaches or exceeds the  $\frac{i}{nAbs}$  quantile.

<sup>2</sup>Assuming  $\mu(n)$  is  $\mathcal{O}(1)$  in both time and space.

When paired with the QB abstraction class, the equalDistVB schemes also attempts to partition nodes into abstract states of equal mass under the proposal. This in corresponds to the condition for Proposition 4.2.0.3 for stratified importance sampling variance reduction.

**Time Complexity.**<sup>2</sup>

$\mu(\mathbf{A}_{1\dots i})$  can be updated progressively in constant time, and thus computation of  $\mathcal{Q}_i$  at each iteration can also be done in constant time. Partitioning is achieved via one pass through  $|\mathbf{n}^*|$  leading to  $\mathcal{O}(|\mathbf{n}| \log |\mathbf{n}|)$  time complexity due to sorting.

**Space Complexity.**<sup>2</sup>

No more than linear space is required.  $\mathcal{O}(|\mathbf{n}|)$

**Result on Running Example.**

$\{1.0, 1.1, 1.2, 1.3, 1.4, 1.5, 10, 100\}, \{\}, \{\}, \{\}$

Although, this method hopes to find a balance between intuitions previously explored, and without compromising speed and efficiency of abstract state generation, from the running example we can see how this method yield undesirable results in the presence of certain distributions of node values. In this example, the first quantile is only reached after all the nodes have been added to the first abstract state, leaving no nodes remaining to be partitioned into the subsequent abstract states.

### 6.0.4 equalDistVB2

$\Psi_{\text{equalDistVB2}}$  (Algorithm 7)

---

**Algorithm 7:**  $\Psi_{\text{equalDistVB2}}$

---

**input** : A set of nodes  $\mathbf{n}$  to be partitioned into  $nAbs$  abstract states; a value function  $\mu(\cdot)$

**output** : With  $\mu(\mathbf{A}_{1,\dots,i}) = (\sum_{j=1}^i \sum_{n' \in \mathbf{A}_j} \mu(n'), n_{\mathbf{A}_i}^{\text{last}}$  be the last node in  $\mathbf{A}_i$ , and  $\mathcal{Q}_i = \frac{i \cdot \sum_{n \in \mathbf{n}^*} \mu(n)}{nAbs}$ ,  $\mathbf{n}$  partitioned into abstract states<sup>1</sup>  $\mathbf{A} = \{\mathbf{A}_i \mid i \in \{1, \dots, nAbs\}\}$  such that for  $i = 1, \dots, nAbs$  in order,  $(\mu(\mathbf{A}_{1,\dots,i}) \geq \mathcal{Q}_i) \wedge ((\mathbf{A}_i = \{\}) \vee (\mu(\mathbf{A}_{1,\dots,i}) - \mu(n_{\mathbf{A}_i}^{\text{last}}) < \mathcal{Q}_i))$

```

1 begin
2    $\mathbf{n}^* \leftarrow \text{SORT}(\mathbf{n}, \mu, \text{high-to-low})$ 
3    $j \leftarrow 1$ 
4   foreach  $i \leftarrow 1, \dots, nAbs$  do
5      $\mathbf{A}_i \leftarrow \{\}$ 
6     while  $\mu(\mathbf{A}_{1,\dots,i}) < \mathcal{Q}_i$  do
7        $\mathbf{A}_i \leftarrow \mathbf{A}_i \cup \{n_j^*\}$ 
8        $j \leftarrow j + 1$ 
9     end
10  end
11   $\mathbf{A} \leftarrow \cup_{i=1}^{nAbs} \mathbf{A}_i$ 
12  return  $\mathbf{A}$ 
13 end
```

---

By simply reversing the sort order, equalDistVB2 is able to use the same partitioning strategy  $\Psi_{\text{equalDistVB}}$  associated with equalDistVB meanwhile mitigate some of the overfilling of abstract states.

**Time Complexity.**<sup>2</sup>

$\mu(\mathbf{A}_{1\dots i})$  can be updated progressively in constant time, and thus computation of  $\mathcal{Q}_i$  at each iteration can also be done in constant time. Partitioning is achieved via one pass through  $|\mathbf{n}^*|$  leading to  $\mathcal{O}(|\mathbf{n}| \log |\mathbf{n}|)$  time complexity due to sorting.

**Space Complexity.**<sup>2</sup>

No more than linear space is required.  $\mathcal{O}(|\mathbf{n}|)$

**Result on Running Example.**

$\{100\}, \{\}, \{\}, \{10, 1.5, 1.4, 1.3, 1.2, 1.1, 1.0\}$

We see that equalDistVB2 can still be subject to over packing of abstract states. Next we present two more equalDistVB variants that continue to mitigate this artifact.



## 6.0.5 equalDistVB3

$\Psi_{equalDistVB3}$  (Algorithm 8)

---

**Algorithm 8:**  $\Psi_{equalDistVB3}$

---

**input** : A set of nodes  $\mathbf{n}$  to be partitioned into  $nAbs$  abstract states; a value function  $\mu(\cdot)$

**output** : With  $\mu(\mathbf{A}_{1,\dots,i}) = (\sum_{j=1}^i \sum_{n' \in \mathbf{A}_j} \mu(n'), n_{\mathbf{A}_i}^{last}$  be the last node in  $\mathbf{A}_i$ , and  $Q_i = \frac{i \cdot \sum_{n \in \mathbf{n}^*} \mu(n)}{nAbs}$ ,  $\mathbf{n}$  partitioned into abstract states<sup>1</sup>  $\mathbf{A} = \{\mathbf{A}_i \mid i \in \{1, \dots, nAbs\}\}$  such that for  $i = 1, \dots, nAbs$  in order,  $(\mu(\mathbf{A}_{1,\dots,i}) \geq Q_i) \wedge ((|\mathbf{A}_i| = 1) \vee (\mu(\mathbf{A}_{1,\dots,i}) - \mu(n_{\mathbf{A}_i}^{last}) < Q_i))$

```

1 begin
2    $\mathbf{n}^* \leftarrow SORT(\mathbf{n}, \mu, \text{high-to-low})$ 
3    $j \leftarrow 1$ 
4   foreach  $i \leftarrow 1, \dots, nAbs$  do
5      $\mathbf{A}_i \leftarrow \{n_j^*\}$ 
6      $j \leftarrow j + 1$ ;
7     while  $\mu(\mathbf{A}_{1,\dots,i}) < Q_i$  do
8        $\mathbf{A}_i \leftarrow \mathbf{A}_i \cup \{n_j^*\}$ 
9        $j \leftarrow j + 1$ 
10    end
11  end
12   $\mathbf{A} \leftarrow \cup_{i=1}^{nAbs} \mathbf{A}_i$ 
13  return  $\mathbf{A}$ 
14 end
```

---

In order to lessen over packing and ensure abstract states are not left empty, equalDistVB3 modifies equalDistVB2 so that, after processing of each abstract state, the next state is forced an addition of at least a single node by default.

**Time Complexity.**<sup>2</sup>

$\mu(\mathbf{A}_{1\dots i})$  can be updated progressively in constant time, and thus computation of  $Q_i$  at each iteration can also be done in constant time. Partitioning is achieved via one pass through  $|\mathbf{n}^*|$  leading to  $\mathcal{O}(|\mathbf{n}| \log |\mathbf{n}|)$  time complexity due to sorting.

**Space Complexity.**<sup>2</sup>

No more than linear space is required.  $\mathcal{O}(|\mathbf{n}|)$

**Result on Running Example.**

$\{100\}, \{10\}, \{1.5\}, \{1.4, 1.3, 1.2, 1.1, 1.0\}$

Still highly efficient, equalDistVB3 manages to ensure that the provided  $nAbs$  granularity is honored, allowing users better control of the search vs. sampling interpolation possible with Abstraction Sampling.

## 6.0.6 equalDistVB4

$\Psi_{equalDistVB4}$  (Algorithm 9)

The final variant of the equalDist schemes, equalDistVB4 attempts to perform a more even partitioning than the previous variants by recomputing quantiles. Each time the algorithm progresses to processing a new abstract state, remaining nodes and abstract states are used to compute new quantiles which are then used to guide filling of the current abstract state in the same way previously done.

**Time Complexity.**<sup>2</sup>

$\mu(\mathbf{A}_{1\dots i})$  can be updated progressively in constant time, and thus computation of  $\hat{Q}_i$  at each iteration can also be done in constant time. Partitioning is achieved via one pass through  $|\mathbf{n}^*|$  leading to  $\mathcal{O}(|\mathbf{n}| \log |\mathbf{n}|)$  time complexity due to sorting.

**Space Complexity.**<sup>2</sup>

No more than linear space is required.  $\mathcal{O}(|\mathbf{n}|)$

**Result on Running Example.**

$\{100\}, \{10\}, \{1.5, 1.4, 1.3\}, \{1.2, 1.1, 1.0\}$

Still highly efficient, equalDistVB3 manages to ensure that the provided  $nAbs$  granularity is honored, allowing users better

---

**Algorithm 9:**  $\Psi_{equalDistVB4}$ 

---

**input** : A set of nodes  $\mathbf{n}$  to be partitioned into  $nAbs$  abstract states; a value function  $\mu(\cdot)$

**output** : With  $\mu(\mathbf{A}_{1,\dots,i}) = (\sum_{j=1}^i \sum_{n' \in \mathbf{A}_j} \mu(n'))$ ,  $n_{\mathbf{A}_i}^{\text{last}}$  be the last node in  $\mathbf{A}_i$ , and  $\widehat{Q}_i = \frac{\mu(\mathbf{n}^*) - \mu(\mathbf{A}_{1,\dots,i-1})}{nAbs - i + 1}$ ,  $\mathbf{n}$  partitioned into abstract states<sup>1</sup>  $\mathbf{A} = \{\mathbf{A}_i \mid i \in \{1, \dots, nAbs\}\}$  such that for  $i = 1, \dots, nAbs$  in order,  $(\mu(\mathbf{A}_i) \geq \widehat{Q}_i) \wedge ((|\mathbf{A}_i| = 1) \vee (\mu(\mathbf{A}_i) - \mu(n_{\mathbf{A}_i}^{\text{last}}) < \widehat{Q}_i))$

```
1 begin
2    $\mathbf{n}^* \leftarrow \text{SORT}(\mathbf{n}, \mu, \text{high-to-low})$ 
3    $j \leftarrow 1$ 
4   foreach  $i \leftarrow 1, \dots, nAbs$  do
5      $\mathbf{A}_i \leftarrow \{\}$ 
6     while  $\mu(\mathbf{A}_i) < \widehat{Q}_i$  do
7        $\mathbf{A}_i \leftarrow \mathbf{A}_i \cup \{n_j^*\}$ 
8        $j \leftarrow j + 1$ 
9     end
10  end
11   $\mathbf{A} \leftarrow \cup_{i=1}^{nAbs} \mathbf{A}_i$ 
12  return  $\mathbf{A}$ 
13 end
```

---

control of the search vs. sampling interpolation possible with Abstraction Sampling.

### 6.0.7 randVB

$\Psi_{randVB}$  (Algorithm 10)

---

**Algorithm 10:**  $\Psi_{randVB}$ 

---

**input** : A set of nodes  $\mathbf{n}$  to be partitioned into  $nAbs$  abstract states; a value function  $\mu(\cdot)$

**output** :  $\mathbf{n}$  partitioned into abstract states<sup>1</sup>  $\mathbf{A} = \{\mathbf{A}_i \mid i \in \{1, \dots, nAbs\}\}$

```
1 begin
2    $\mathbf{n}^* \leftarrow \text{SORT}(\mathbf{n}, \mu, \text{high-to-low})$ 
3    $\mathbf{s} \sim \text{Unif}(\{\mathbf{M} \subseteq \{1, \dots, |\mathbf{n}^*| - 1\} \mid |\mathbf{M}| = nAbs - 1\})$ 
4    $\mathbf{s}^* \leftarrow \text{SORT}(\mathbf{s})$ 
5    $j \leftarrow 1$ 
6   foreach  $i \leftarrow 1, \dots, nAbs - 1$  do
7      $\mathbf{A}_i = \{n_j^*, \dots, n_{s_i^*}^*\}$ 
8      $j \leftarrow s_i^* + 1$ 
9   end
10   $\mathbf{A}_{nAbs} = \{n_j^*, \dots, n_{|\mathbf{n}^*|}^*\}$ 
11   $\mathbf{A} = \cup_{i=1}^{nAbs} \mathbf{A}_i$ 
12  return  $\mathbf{A}$ 
13 end
```

---

If the quality of  $\mu(\cdot)$  as a measure of similarity is unknown or poor, it could instead be beneficial to rely on randomness to ensure a diverse sampling of abstractions. randVB does this by sampling  $nAbs - 1$  partition points between the sorted nodes  $\mathbf{n}^*$  uniformly at random and without replacement, and then partitions the nodes accordingly. As a result, abstract states are formed such that nodes are still grouped according to  $\mu(\cdot)$ , but the size of those groups varies.

#### **Time Complexity.**<sup>2</sup>

$\mathcal{O}(|\mathbf{n}| \log |\mathbf{n}|)$  time complexity due to sorting.

#### **Space Complexity.**<sup>2</sup>

No more than linear space is required.  $\mathcal{O}(|\mathbf{n}|)$

#### **Result on Running Example.**

$\{100, 10\}, \{1.5\}, \{1.4, 1.3, 1.2\}, \{1.1, 1.0\};$   
 $\{100\}, \{10, 1.5, 1.4, 1.3\}, \{1.2, 1.1\}, \{1.0\}; \dots \text{etc.}$

## 7 EXTENDED RESULTS

In extension to the main paper, here we show a more comprehensive set of aggregated data tables, now also including the standard deviation of the errors, the average number of samples drawn, and average probe sizes.

### 7.1 SUMMARY COMPARISON.

#### 7.1.1 Exact Problems

| iB-5, t-1300sec, Exact |            |      | DBN  |            |                 |                   |                 |
|------------------------|------------|------|------|------------|-----------------|-------------------|-----------------|
| Class                  | Scheme     | nAbs | Fail | Avg. Error | std(Avg. Error) | Avg. Num. Samples | Avg. Probe Size |
| HB                     | simple     | 2048 | 0    | 0.440      | 0.862           | 354               | 233936          |
|                        | minVar     | 1    | 0    | 1.361      | 2.840           | 600260            | 136             |
|                        | equalDist  | 1    | 0    | 1.365      | 2.835           | 634640            | 136             |
|                        | equalDist2 | 1    | 0    | 1.570      | 3.292           | 493719            | 196             |
|                        | equalDist3 | 1    | 0    | 1.489      | 3.018           | 489934            | 196             |
|                        | equalDist4 | 1024 | 0    | 2.819      | 5.501           | 114               | 2965761         |
|                        | rand       | 256  | 0    | 0.496      | 0.796           | 2840              | 30952           |
| HRB                    | simple     | 2048 | 0    | 0.491      | 0.976           | 353               | 233936          |
|                        | minVar     | 1    | 0    | 1.500      | 2.972           | 635538            | 136             |
|                        | equalDist  | 1    | 0    | 1.305      | 2.508           | 654598            | 136             |
|                        | equalDist2 | 1    | 0    | 1.549      | 3.405           | 664595            | 136             |
|                        | equalDist3 | 1    | 0    | 1.405      | 3.014           | 662702            | 136             |
|                        | equalDist4 | 1    | 0    | 1.511      | 3.064           | 664347            | 136             |
|                        | rand       | 2048 | 0    | 0.451      | 0.719           | 358               | 233936          |
| QB                     | simple     | 1    | 0    | 1.469      | 2.920           | 677854            | 136             |
|                        | minVar     | 2048 | 0    | 0.050      | 0.173           | 10                | 233936          |
|                        | equalDist  | 4    | 0    | 1.174      | 2.407           | 478845            | 181             |
|                        | equalDist2 | 2048 | 0    | 0.736      | 1.831           | 17787             | 3326            |
|                        | equalDist3 | 2048 | 0    | 0.042      | 0.137           | 346               | 233936          |
|                        | equalDist4 | 2048 | 0    | 0.130      | 0.378           | 1969              | 153490          |
|                        | rand       | 1    | 0    | 1.295      | 2.723           | 683431            | 136             |
| CTX                    | rand       | 4    | 0    | 1.381      | 2.626           | 197143            | 476             |
|                        | rel        | 1    | 0    | 1.472      | 3.093           | 695636            | 136             |
| RAND                   | rand       | 2048 | 0    | 0.104      | 0.243           | 359               | 233936          |

Table 1

| iB-5, t-300sec, Exact |            |      | Grids |            |                 |                   |                 |
|-----------------------|------------|------|-------|------------|-----------------|-------------------|-----------------|
| Class                 | Scheme     | nAbs | Fail  | Avg. Error | std(Avg. Error) | Avg. Num. Samples | Avg. Probe Size |
| HB                    | simple     | 1024 | 0     | 2.202      | 3.807           | 1536              | 365339          |
|                       | minVar     | 16   | 0     | 3.251      | 5.615           | 37401             | 6295            |
|                       | equalDist  | 2048 | 0     | 10.854     | 19.810          | 12787             | 36088           |
|                       | equalDist2 | 512  | 0     | 8.050      | 14.709          | 44538             | 11654           |
|                       | equalDist3 | 2048 | 0     | 2.764      | 4.210           | 588               | 805429          |
|                       | equalDist4 | 64   | 0     | 6.029      | 11.585          | 10521             | 359937          |
|                       | rand       | 2048 | 0     | 2.248      | 3.933           | 709               | 737966          |
| HRB                   | simple     | 4    | 0     | 9.667      | 17.275          | 441504            | 1678            |
|                       | minVar     | 64   | 0     | 2.319      | 3.816           | 3046              | 25570           |
|                       | equalDist  | 256  | 0     | 10.635     | 18.892          | 86568             | 6357            |
|                       | equalDist2 | 2048 | 0     | 6.790      | 11.752          | 12056             | 35124           |
|                       | equalDist3 | 1024 | 0     | 2.292      | 3.951           | 1259              | 396048          |
|                       | equalDist4 | 512  | 0     | 1.829      | 3.057           | 2787              | 188320          |
|                       | rand       | 4    | 0     | 6.122      | 10.479          | 465813            | 1643            |
| QB                    | simple     | 16   | 0     | 10.076     | 17.905          | 113719            | 6499            |
|                       | minVar     | 1024 | 0     | 1.566      | 2.844           | 14                | 397296          |
|                       | equalDist  | 2048 | 0     | 8.134      | 16.643          | 12162             | 70457           |
|                       | equalDist2 | 2048 | 0     | 4.405      | 9.051           | 11932             | 71415           |
|                       | equalDist3 | 2048 | 0     | 1.771      | 3.391           | 612               | 788719          |
|                       | equalDist4 | 512  | 0     | 1.754      | 3.159           | 2793              | 190568          |
|                       | rand       | 256  | 0     | 6.048      | 10.294          | 6041              | 100691          |
| CTX                   | rand       | 4    | 0     | 5.030      | 9.168           | 471163            | 1421            |
|                       | rel        | 64   | 0     | 4.021      | 7.528           | 36934             | 14867           |
| RAND                  | rand       | 1024 | 0     | 1.501      | 2.530           | 1504              | 390548          |

Table 2

| iB-5, t-300sec, Exact |            |      | Pedigree |            |                 |                   |                 |  |
|-----------------------|------------|------|----------|------------|-----------------|-------------------|-----------------|--|
| Class                 | Scheme     | nAbs | Fail     | Avg. Error | std(Avg. Error) | Avg. Num. Samples | Avg. Probe Size |  |
| HB                    | simple     | 2048 | 0        | 0.150      | 0.564           | 393               | 1208067         |  |
|                       | minVar     | 64   | 0        | 0.422      | 0.894           | 1904              | 34760           |  |
|                       | equalDist  | 1024 | 0        | 0.303      | 0.626           | 1104              | 406884          |  |
|                       | equalDist2 | 1024 | 0        | 0.315      | 0.536           | 1090              | 410306          |  |
|                       | equalDist3 | 1024 | 0        | 0.279      | 0.539           | 727               | 606552          |  |
|                       | equalDist4 | 512  | 0        | 0.214      | 0.622           | 1526              | 305759          |  |
|                       | rand       | 2048 | 0        | 0.185      | 0.473           | 406               | 1170793         |  |
| HRB                   | simple     | 256  | 0        | 0.225      | 0.378           | 3637              | 155656          |  |
|                       | minVar     | 256  | 0        | 0.309      | 0.543           | 131               | 149534          |  |
|                       | equalDist  | 1024 | 0        | 0.638      | 0.921           | 1653              | 247759          |  |
|                       | equalDist2 | 16   | 0        | 0.457      | 0.646           | 83869             | 5396            |  |
|                       | equalDist3 | 16   | 0        | 0.537      | 0.843           | 63832             | 8067            |  |
|                       | equalDist4 | 64   | 0        | 0.483      | 0.836           | 14789             | 34813           |  |
|                       | rand       | 64   | 0        | 0.666      | 0.983           | 17216             | 36226           |  |
| QB                    | simple     | 256  | 0        | 0.297      | 0.510           | 3672              | 153687          |  |
|                       | minVar     | 64   | 0        | 0.210      | 0.561           | 1939              | 36977           |  |
|                       | equalDist  | 2048 | 0        | 0.144      | 0.646           | 524               | 808760          |  |
|                       | equalDist2 | 1024 | 0        | 0.145      | 0.637           | 1067              | 410631          |  |
|                       | equalDist3 | 512  | 0        | 0.148      | 0.643           | 1403              | 324983          |  |
|                       | equalDist4 | 512  | 0        | 0.134      | 0.600           | 1415              | 322792          |  |
|                       | rand       | 16   | 0        | 0.740      | 1.021           | 76974             | 8055            |  |
| CTX                   | rand       | 16   | 0        | 0.540      | 0.827           | 169911            | 2790            |  |
|                       | rel        | 64   | 0        | 0.424      | 0.653           | 28214             | 29061           |  |
| RAND                  | rand       | 1024 | 0        | 0.143      | 0.619           | 878               | 620063          |  |

Table 3

| iB-5, t-300sec, Exact |            |      | Promedas |            |                 |                   |                 |  |
|-----------------------|------------|------|----------|------------|-----------------|-------------------|-----------------|--|
| Class                 | Scheme     | nAbs | Fail     | Avg. Error | std(Avg. Error) | Avg. Num. Samples | Avg. Probe Size |  |
| HB                    | simple     | 1024 | 0        | 0.575      | 1.288           | 7878163           | 215898          |  |
|                       | minVar     | 16   | 2        | 2.509      | 5.329           | 4119191           | 2304            |  |
|                       | equalDist  | 1024 | 0        | 2.332      | 3.857           | 8057221           | 145513          |  |
|                       | equalDist2 | 64   | 0        | 2.123      | 4.632           | 8086745           | 8209            |  |
|                       | equalDist3 | 256  | 0        | 2.196      | 4.354           | 8212578           | 53287           |  |
|                       | equalDist4 | 2048 | 0        | 1.355      | 2.486           | 8106429           | 471471          |  |
|                       | rand       | 2048 | 0        | 0.752      | 1.476           | 8136226           | 382946          |  |
| HRB                   | simple     | 2048 | 0        | 0.705      | 1.594           | 8281435           | 444640          |  |
|                       | minVar     | 16   | 1        | 2.801      | 5.552           | 8302630           | 2403            |  |
|                       | equalDist  | 16   | 4        | 4.055      | 7.212           | 8505442           | 1255            |  |
|                       | equalDist2 | 16   | 2        | 3.445      | 6.549           | 8445561           | 1667            |  |
|                       | equalDist3 | 16   | 2        | 2.656      | 5.561           | 8389700           | 2330            |  |
|                       | equalDist4 | 2048 | 0        | 2.024      | 3.247           | 8278922           | 429451          |  |
|                       | rand       | 1024 | 1        | 2.165      | 4.691           | 8284836           | 184056          |  |
| QB                    | simple     | 256  | 1        | 3.164      | 5.634           | 8156519           | 44804           |  |
|                       | minVar     | 64   | 1        | 1.062      | 3.999           | 8149950           | 13097           |  |
|                       | equalDist  | 2048 | 0        | 0.583      | 1.053           | 8159447           | 85975           |  |
|                       | equalDist2 | 2048 | 0        | 0.539      | 1.098           | 8146812           | 87006           |  |
|                       | equalDist3 | 2048 | 0        | 0.412      | 0.917           | 8136397           | 517395          |  |
|                       | equalDist4 | 512  | 0        | 0.437      | 1.062           | 8155880           | 126503          |  |
|                       | rand       | 16   | 2        | 5.988      | 12.148          | 8401169           | 1892            |  |
| CTX                   | rand       | 1024 | 1        | 2.442      | 4.755           | 8045093           | 2016            |  |
|                       | rel        | 64   | 6        | 4.349      | 7.852           | 8384108           | 3268            |  |
| RAND                  | rand       | 1024 | 0        | 0.513      | 1.033           | 8047804           | 228960          |  |

Table 4

7.1.2 LARGE Problems

| iB-10, t-1200sec, LARGE |            |      | DBN  |            |                 |                   |                 |
|-------------------------|------------|------|------|------------|-----------------|-------------------|-----------------|
| Class                   | Scheme     | nAbs | Fail | Avg. Error | std(Avg. Error) | Avg. Num. Samples | Avg. Probe Size |
| HB                      | simple     | 512  | 0    | 3.059      | 5.994           | 466               | 213236          |
|                         | minVar     | 1    | 0    | 6.372      | 10.410          | 170425            | 434             |
|                         | equalDist  | 1    | 0    | 6.354      | 10.259          | 171742            | 434             |
|                         | equalDist2 | 1    | 0    | 6.172      | 9.889           | 146566            | 598             |
|                         | equalDist3 | 1    | 0    | 6.548      | 10.206          | 144646            | 598             |
|                         | equalDist4 | 1    | 0    | 6.525      | 10.576          | 162296            | 434             |
|                         | rand       | 64   | 0    | 1.855      | 2.986           | 3682              | 27039           |
| HRB                     | simple     | 2048 | 0    | 3.202      | 6.388           | 116               | 844724          |
|                         | minVar     | 1    | 0    | 6.102      | 9.811           | 167382            | 434             |
|                         | equalDist  | 1    | 0    | 6.273      | 10.219          | 165303            | 434             |
|                         | equalDist2 | 1    | 0    | 6.689      | 10.719          | 164615            | 434             |
|                         | equalDist3 | 1    | 0    | 6.564      | 10.301          | 163186            | 434             |
|                         | equalDist4 | 1    | 0    | 6.606      | 10.704          | 162441            | 434             |
|                         | rand       | 2048 | 0    | 1.915      | 3.994           | 116               | 844724          |
| QB                      | simple     | 1    | 0    | 6.540      | 10.583          | 162844            | 434             |
|                         | minVar     | 2048 | 0    | 1.837      | 4.023           | 11                | 844724          |
|                         | equalDist  | 512  | 0    | 5.423      | 9.545           | 28518             | 50129           |
|                         | equalDist2 | 2048 | 0    | 3.813      | 7.105           | 11104             | 162286          |
|                         | equalDist3 | 2048 | 0    | 1.645      | 3.853           | 115               | 844724          |
|                         | equalDist4 | 2048 | 0    | 1.643      | 3.847           | 170               | 758313          |
|                         | rand       | 4    | 0    | 6.292      | 9.781           | 52602             | 1721            |
| CTX                     | rand       | 64   | 0    | 5.710      | 8.760           | 4947              | 22519           |
|                         | rel        | 1    | 0    | 6.267      | 10.128          | 165870            | 434             |
| RAND                    | rand       | 2048 | 0    | 2.123      | 4.214           | 116               | 844724          |

Table 5

| iB-10, t-1200sec, LARGE |            |      | Grids |            |                 |                   |                 |
|-------------------------|------------|------|-------|------------|-----------------|-------------------|-----------------|
| Class                   | Scheme     | nAbs | Fail  | Avg. Error | std(Avg. Error) | Avg. Num. Samples | Avg. Probe Size |
| HB                      | simple     | 2048 | 0     | 73.710     | 117.967         | 585               | 5281698         |
|                         | minVar     | 64   | 0     | 71.628     | 112.070         | 1948              | 184817          |
|                         | equalDist  | 2048 | 0     | 149.888    | 252.503         | 6894              | 438547          |
|                         | equalDist2 | 1024 | 0     | 119.823    | 195.442         | 12859             | 247710          |
|                         | equalDist3 | 64   | 0     | 82.927     | 124.857         | 15758             | 197893          |
|                         | equalDist4 | 1024 | 0     | 63.194     | 97.515          | 1020              | 2846847         |
|                         | rand       | 2048 | 0     | 82.203     | 132.286         | 527               | 5492402         |
| HRB                     | simple     | 1024 | 0     | 193.654    | 311.138         | 1042              | 3061184         |
|                         | minVar     | 512  | 0     | 37.972     | 56.653          | 29                | 1534848         |
|                         | equalDist  | 2048 | 0     | 127.990    | 216.992         | 6524              | 475696          |
|                         | equalDist2 | 2048 | 0     | 104.502    | 168.754         | 6388              | 501514          |
|                         | equalDist3 | 2048 | 0     | 38.936     | 52.976          | 429               | 6090687         |
|                         | equalDist4 | 2048 | 0     | 34.676     | 50.051          | 460               | 5664129         |
|                         | rand       | 16   | 0     | 160.168    | 262.678         | 78263             | 48729           |
| QB                      | simple     | 16   | 0     | 197.931    | 331.349         | 73034             | 51032           |
|                         | minVar     | 1024 | 0     | 28.423     | 44.701          | 7                 | 3064517         |
|                         | equalDist  | 2048 | 0     | 118.547    | 209.112         | 6013              | 932447          |
|                         | equalDist2 | 2048 | 0     | 91.994     | 160.979         | 5935              | 939064          |
|                         | equalDist3 | 2048 | 0     | 19.277     | 31.795          | 429               | 6135039         |
|                         | equalDist4 | 2048 | 0     | 18.866     | 34.470          | 462               | 5658527         |
|                         | rand       | 16   | 0     | 163.973    | 270.397         | 78137             | 48849           |
| CTX                     | rand       | 512  | 0     | 111.104    | 189.309         | 53385             | 66495           |
|                         | rel        | 1024 | 0     | 80.633     | 131.304         | 1990              | 1210381         |
| RAND                    | rand       | 2048 | 0     | 19.053     | 30.561          | 517               | 5915471         |

Table 6

| iB-10, t-1200sec, LARGE |            |      | Linkage-Type4 |            |                 |                   |                 |  |  |
|-------------------------|------------|------|---------------|------------|-----------------|-------------------|-----------------|--|--|
| Class                   | Scheme     | nAbs | Fail          | Avg. Error | std(Avg. Error) | Avg. Num. Samples | Avg. Probe Size |  |  |
| HB                      | simple     | 2048 | 21            | 47.383     | 124.818         | 215               | 6362535         |  |  |
|                         | minVar     | 256  | 37            | 133.377    | 208.955         | 118               | 526228          |  |  |
|                         | equalDist  | 2048 | 37            | 136.462    | 209.952         | 806               | 1725651         |  |  |
|                         | equalDist2 | 2048 | 36            | 132.531    | 206.716         | 775               | 1763041         |  |  |
|                         | equalDist3 | 2048 | 32            | 118.653    | 191.472         | 373               | 4231305         |  |  |
|                         | equalDist4 | 2048 | 29            | 98.222     | 180.908         | 260               | 5348049         |  |  |
|                         | rand       | 2048 | 21            | 52.171     | 117.178         | 258               | 5548243         |  |  |
| HRB                     | simple     | 2048 | 17            | 48.474     | 105.528         | 201               | 7170175         |  |  |
|                         | minVar     | 512  | 38            | 138.131    | 211.272         | 31                | 1203151         |  |  |
|                         | equalDist  | 2048 | 32            | 123.253    | 192.089         | 1138              | 1438777         |  |  |
|                         | equalDist2 | 2048 | 34            | 129.751    | 198.056         | 1114              | 1453506         |  |  |
|                         | equalDist3 | 2048 | 31            | 118.091    | 185.967         | 405               | 4586845         |  |  |
|                         | equalDist4 | 2048 | 26            | 95.895     | 158.305         | 335               | 5182785         |  |  |
|                         | rand       | 1024 | 18            | 127.021    | 162.172         | 576               | 3170049         |  |  |
| QB                      | simple     | 2048 | 13            | 48.681     | 102.256         | 165               | 7582217         |  |  |
|                         | minVar     | 256  | 31            | 93.058     | 176.650         | 115               | 595380          |  |  |
|                         | equalDist  | 2048 | 22            | 46.196     | 128.408         | 324               | 3606296         |  |  |
|                         | equalDist2 | 1024 | 21            | 40.310     | 115.108         | 823               | 1613744         |  |  |
|                         | equalDist3 | 1024 | 20            | 37.490     | 115.666         | 428               | 3151667         |  |  |
|                         | equalDist4 | 2048 | 16            | 30.512     | 104.300         | 155               | 7276760         |  |  |
|                         | rand       | 256  | 17            | 156.992    | 197.622         | 2123              | 786014          |  |  |
| CTX                     | rand       | 2048 | 53            | 194.741    | 250.879         | 78237             | 12693           |  |  |
|                         | rel        | 1024 | 37            | 129.189    | 210.249         | 911               | 2128473         |  |  |
| RAND                    | rand       | 1024 | 19            | 33.804     | 107.942         | 531               | 3043774         |  |  |

Table 7

| iB-10, t-1200sec, LARGE |            |      | Promedas |            |                 |                   |                 |  |  |
|-------------------------|------------|------|----------|------------|-----------------|-------------------|-----------------|--|--|
| Class                   | Scheme     | nAbs | Fail     | Avg. Error | std(Avg. Error) | Avg. Num. Samples | Avg. Probe Size |  |  |
| HB                      | simple     | 1024 | 16       | 5.981      | 14.402          | 5303              | 316842          |  |  |
|                         | minVar     | 16   | 25       | 9.433      | 17.375          | 135360            | 3961            |  |  |
|                         | equalDist  | 64   | 23       | 9.664      | 16.936          | 122333            | 11729           |  |  |
|                         | equalDist2 | 16   | 22       | 9.465      | 17.026          | 438953            | 3209            |  |  |
|                         | equalDist3 | 16   | 18       | 8.534      | 16.129          | 364644            | 3961            |  |  |
|                         | equalDist4 | 16   | 19       | 8.011      | 15.663          | 368986            | 3973            |  |  |
|                         | rand       | 64   | 22       | 8.296      | 16.348          | 129906            | 14836           |  |  |
| HRB                     | simple     | 512  | 15       | 5.849      | 14.157          | 10763             | 158416          |  |  |
|                         | minVar     | 16   | 24       | 9.577      | 17.048          | 130796            | 4001            |  |  |
|                         | equalDist  | 16   | 32       | 11.596     | 19.010          | 546356            | 2629            |  |  |
|                         | equalDist2 | 4    | 25       | 10.380     | 17.881          | 1755156           | 841             |  |  |
|                         | equalDist3 | 16   | 22       | 9.779      | 17.253          | 388573            | 3844            |  |  |
|                         | equalDist4 | 16   | 22       | 9.217      | 16.843          | 383539            | 3876            |  |  |
|                         | rand       | 64   | 27       | 9.556      | 17.661          | 128420            | 15010           |  |  |
| QB                      | simple     | 4    | 34       | 11.919     | 19.156          | 2214241           | 849             |  |  |
|                         | minVar     | 16   | 13       | 5.403      | 13.076          | 127451            | 4261            |  |  |
|                         | equalDist  | 512  | 15       | 5.960      | 13.509          | 21151             | 61005           |  |  |
|                         | equalDist2 | 2048 | 12       | 4.982      | 12.955          | 5495              | 230190          |  |  |
|                         | equalDist3 | 256  | 5        | 2.560      | 8.629           | 16078             | 90936           |  |  |
|                         | equalDist4 | 512  | 5        | 2.476      | 8.229           | 7638              | 187975          |  |  |
|                         | rand       | 4    | 28       | 11.532     | 19.413          | 2330332           | 841             |  |  |
| CTX                     | rand       | 256  | 0        | 3.222      | 5.085           | 160087            | 12862           |  |  |
|                         | rel        | 16   | 34       | 11.247     | 18.992          | 761684            | 2399            |  |  |
| RAND                    | rand       | 1024 | 10       | 3.936      | 11.615          | 5010              | 348002          |  |  |

Table 8

## 7.2 COMPARISON USING 100 SAMPLES.

### 7.2.1 Exact Problems

Table 9

| iB-5, m-100, Exact |            |      | DBN  |            | Grids |            | Pedigree |            | Promedas |            |
|--------------------|------------|------|------|------------|-------|------------|----------|------------|----------|------------|
| Class              | Scheme     | nAbs | Fail | Avg. Error | Fail  | Avg. Error | Fail     | Avg. Error | Fail     | Avg. Error |
| HB                 | simpleQB   | 256  | 0    | 1.601      | 0     | 4.768      | 0        | 0.337      | 14       | 3.121      |
|                    | minVarQB   | 256  | 0    | 5.028      | 0     | 5.134      | 0        | 0.615      | 1        | 5.423      |
|                    | equalDist  | 256  | 0    | 5.269      | 0     | 15.958     | 1        | 2.145      | 13       | 6.556      |
|                    | equalDist2 | 256  | 0    | 5.966      | 0     | 11.009     | 0        | 1.384      | 6        | 6.464      |
|                    | equalDist3 | 256  | 0    | 6.203      | 0     | 5.804      | 0        | 0.669      | 1        | 5.480      |
|                    | equalDist4 | 256  | 0    | 4.501      | 0     | 22.576     | 0        | 1.103      | 1        | 4.382      |
|                    | randQB     | 256  | 0    | 0.712      | 0     | 5.515      | 0        | 0.531      | 13       | 4.988      |
| HRB                | simpleQB   | 256  | 0    | 1.638      | 0     | 15.757     | 0        | 0.721      | 14       | 3.014      |
|                    | minVarQB   | 256  | 0    | 4.703      | 0     | 2.404      | 0        | 0.287      | 1        | 4.295      |
|                    | equalDist  | 256  | 0    | 6.030      | 0     | 16.132     | 1        | 2.817      | 13       | 8.830      |
|                    | equalDist2 | 256  | 0    | 6.361      | 0     | 10.462     | 0        | 2.546      | 6        | 8.272      |
|                    | equalDist3 | 256  | 0    | 6.613      | 0     | 4.236      | 0        | 2.291      | 1        | 7.427      |
|                    | equalDist4 | 256  | 0    | 6.753      | 0     | 3.179      | 0        | 1.241      | 1        | 5.552      |
|                    | randQB     | 256  | 0    | 0.720      | 0     | 9.838      | 0        | 1.818      | 13       | 7.074      |
| QB                 | simpleQB   | 256  | 0    | 5.350      | 0     | 17.406     | 0        | 1.059      | 14       | 9.659      |
|                    | minVarQB   | 256  | 0    | 0.111      | 0     | 1.911      | 0        | 0.223      | 1        | 1.634      |
|                    | equalDist  | 256  | 0    | 5.619      | 0     | 15.533     | 1        | 0.858      | 13       | 5.420      |
|                    | equalDist2 | 256  | 0    | 2.319      | 0     | 11.220     | 0        | 0.563      | 6        | 3.479      |
|                    | equalDist3 | 256  | 0    | 0.173      | 0     | 3.615      | 0        | 0.206      | 1        | 1.473      |
|                    | equalDist4 | 256  | 0    | 0.277      | 0     | 2.305      | 0        | 0.180      | 1        | 1.373      |
|                    | randQB     | 256  | 0    | 4.982      | 0     | 12.653     | 0        | 3.211      | 13       | 19.441     |
| CTX                | rand       | 256  | 0    | 3.587      | 0     | 9.568      | 2        | 4.695      | 3        | 14.386     |
|                    | rel        | 256  | 0    | 5.265      | 0     | 8.013      | 0        | 1.097      | 36       | 10.845     |
| RAND               | rand       | 256  | 0    | 0.288      | 0     | 2.464      | 0        | 0.325      | 3        | 2.570      |

### 7.2.2 LARGE Problems

Table 10

| iB-10, m-100, LARGE |            |      | DBN  |            | Grids |            | Linkage-Type4 |            | Promedas |            |
|---------------------|------------|------|------|------------|-------|------------|---------------|------------|----------|------------|
| Class               | Scheme     | nAbs | Fail | Avg. Error | Fail  | Avg. Error | Fail          | Avg. Error | Fail     | Avg. Error |
| HB                  | simpleQB   | 256  | 0    | 4.179      | 0     | 108.953    | 0             | 189.141    | 14       | 16.389     |
|                     | minVarQB   | 256  | 0    | 8.219      | 0     | 45.460     | 0             | 182.791    | 1        | 17.221     |
|                     | equalDist  | 256  | 0    | 8.013      | 0     | 164.767    | 1             | 230.627    | 13       | 19.890     |
|                     | equalDist2 | 256  | 0    | 8.233      | 0     | 119.203    | 0             | 231.620    | 6        | 18.944     |
|                     | equalDist3 | 256  | 0    | 7.905      | 0     | 67.626     | 0             | 219.364    | 1        | 18.612     |
|                     | equalDist4 | 256  | 0    | 7.588      | 0     | 54.643     | 0             | 199.565    | 1        | 17.186     |
|                     | randQB     | 256  | 0    | 3.741      | 0     | 108.760    | 0             | 203.436    | 13       | 18.494     |
| HRB                 | simpleQB   | 256  | 0    | 4.203      | 0     | 190.126    | 0             | 180.424    | 14       | 15.857     |
|                     | minVarQB   | 256  | 0    | 7.770      | 0     | 29.575     | 0             | 188.654    | 1        | 17.492     |
|                     | equalDist  | 256  | 0    | 7.947      | 0     | 151.765    | 1             | 235.331    | 13       | 20.390     |
|                     | equalDist2 | 256  | 0    | 8.616      | 0     | 114.215    | 0             | 229.609    | 6        | 20.395     |
|                     | equalDist3 | 256  | 0    | 7.653      | 0     | 37.005     | 0             | 222.866    | 1        | 19.932     |
|                     | equalDist4 | 256  | 0    | 8.201      | 0     | 31.368     | 0             | 213.918    | 1        | 18.694     |
|                     | randQB     | 256  | 0    | 3.254      | 0     | 150.130    | 0             | 205.219    | 13       | 19.157     |
| QB                  | simpleQB   | 256  | 0    | 7.921      | 0     | 194.220    | 0             | 180.487    | 14       | 22.732     |
|                     | minVarQB   | 256  | 0    | 2.848      | 0     | 22.838     | 0             | 182.296    | 1        | 11.742     |
|                     | equalDist  | 256  | 0    | 6.443      | 0     | 140.283    | 1             | 192.449    | 13       | 17.245     |
|                     | equalDist2 | 256  | 0    | 4.583      | 0     | 96.859     | 0             | 193.109    | 6        | 15.704     |
|                     | equalDist3 | 256  | 0    | 3.036      | 0     | 25.042     | 0             | 170.706    | 1        | 11.426     |
|                     | equalDist4 | 256  | 0    | 2.715      | 0     | 20.978     | 0             | 162.793    | 1        | 11.885     |
|                     | randQB     | 256  | 0    | 7.791      | 0     | 163.214    | 0             | 205.186    | 13       | 23.984     |
| CTX                 | rand       | 256  | 0    | 4.789      | 0     | 97.951     | 2             | 232.778    | 3        | 16.285     |
|                     | rel        | 256  | 0    | 7.664      | 0     | 65.146     | 0             | 188.194    | 36       | 20.609     |
| RAND                | rand       | 256  | 0    | 3.070      | 0     | 26.185     | 0             | 178.273    | 3        | 13.957     |

### 7.3 TIME SERIES PLOT

#### 7.3.1 LARGE Problems

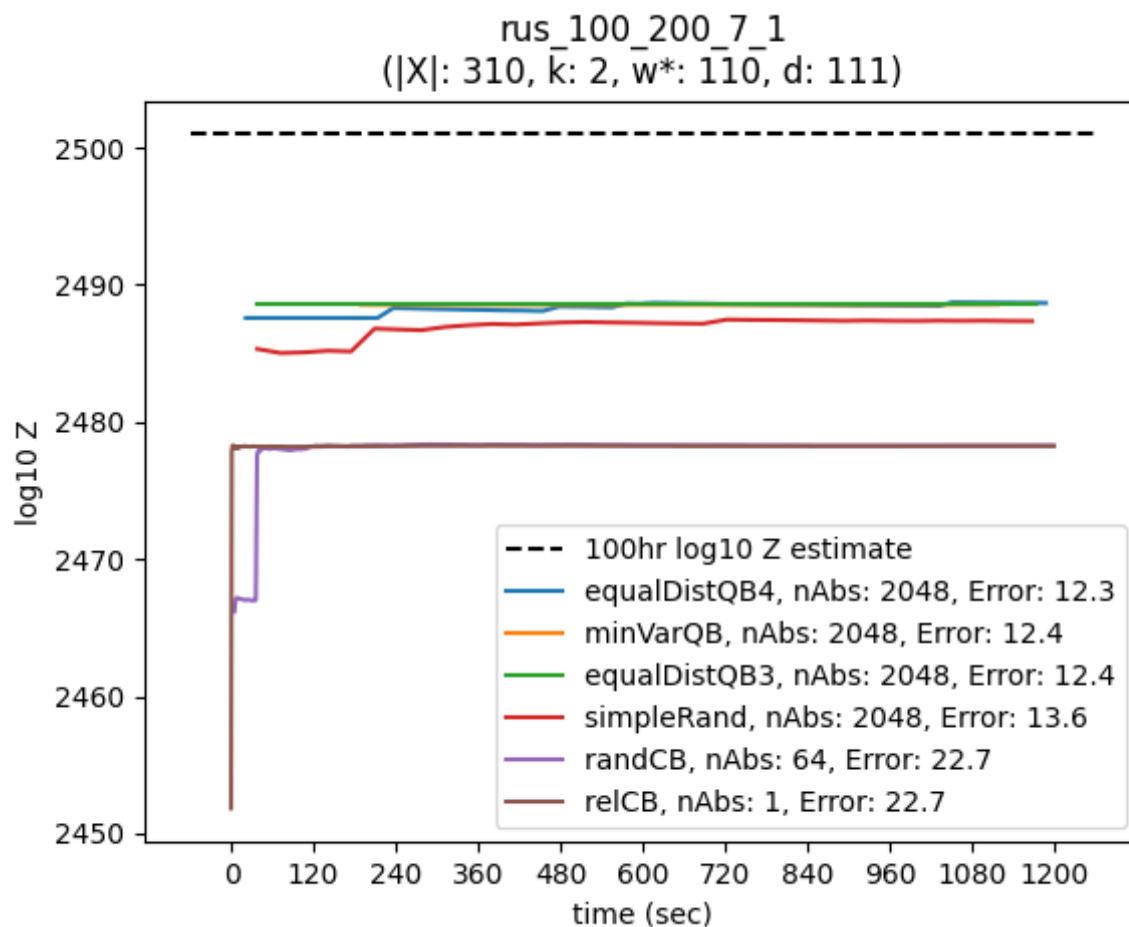

**Plot 1:** Z estimates from various algorithms versus time on DBN problem rus\_100\_200\_7\_1 using  $iB = 10$ . The dashed black line shows the estimated true Z value.



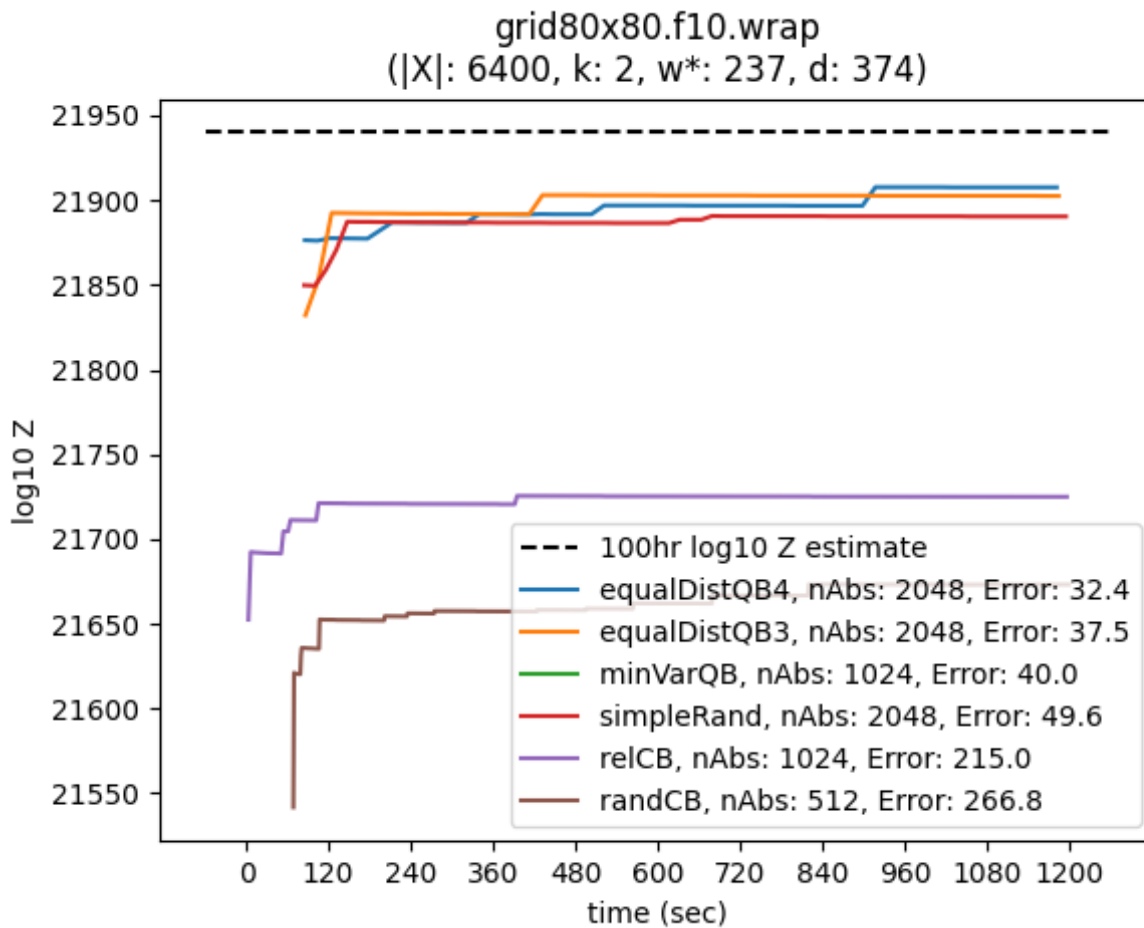

**Plot 2:** Z estimates from various algorithms versus time on Grids problem grid80x80.f10.wrap using  $iB = 10$ . The dashed black line shows the estimated true Z value.

pedfile\_Families\_Type4\_150\_23  
(|X|: 7710, k: 5, w\*: 50, d: 869)

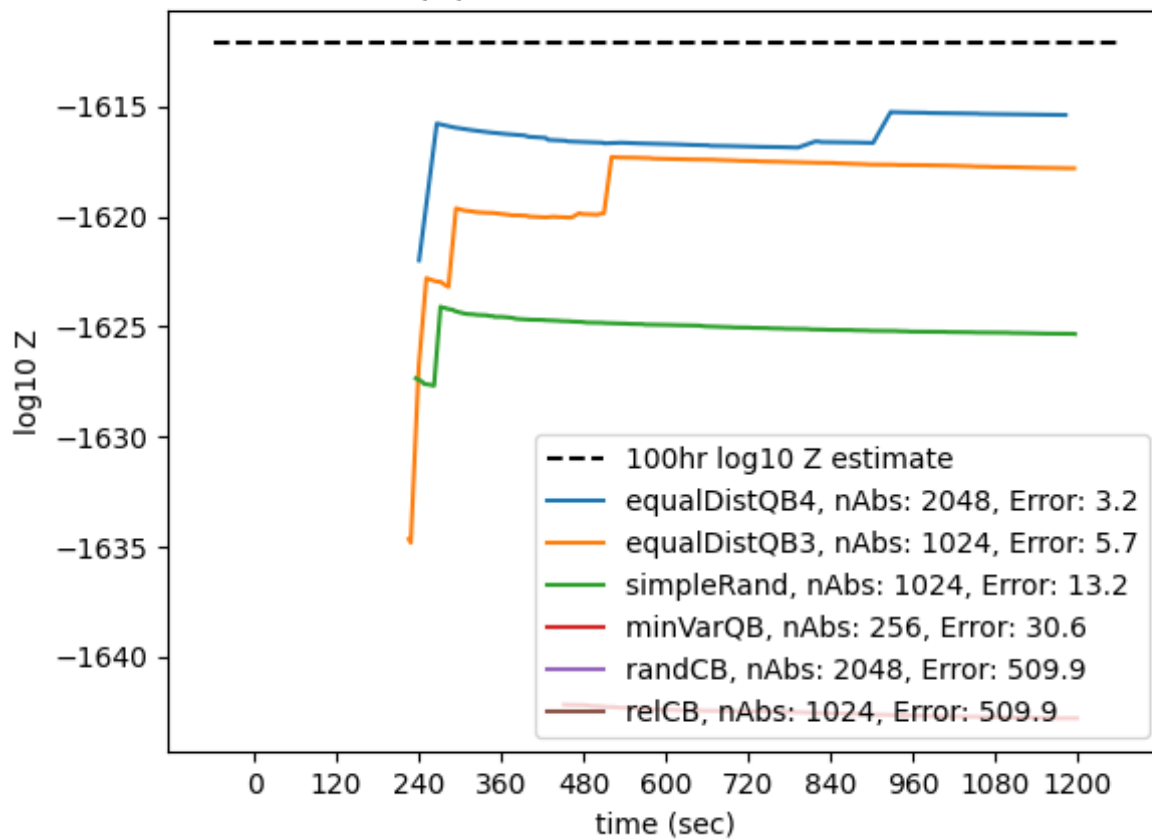

**Plot 3:** Z estimates from various algorithms versus time on Linkage-Type4 problem grid20x20.f15 using  $iB = 10$ . The dashed black line shows the estimated true Z value.

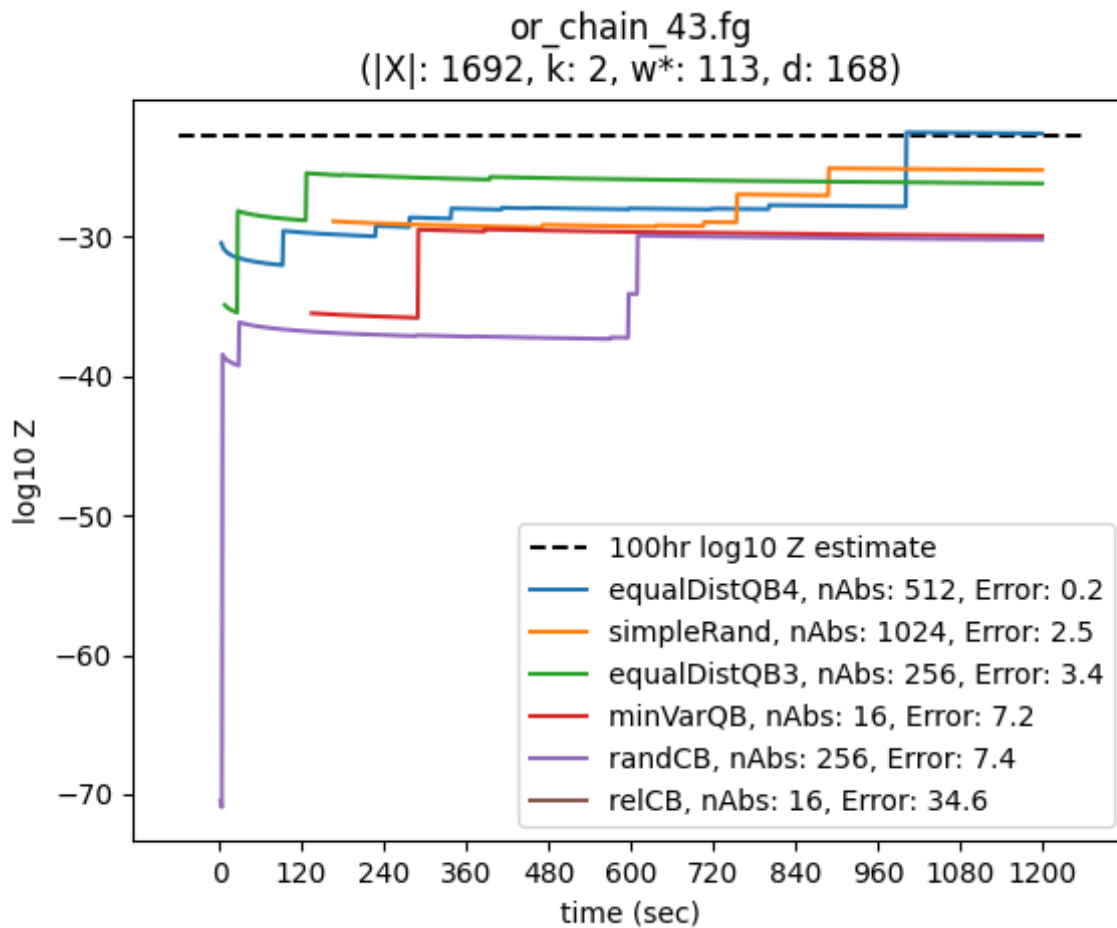

**Plot 4:** Z estimates from various algorithms versus time on Promedas problem or\_chain\_43.fg using  $iB = 10$ . The dashed black line shows the estimated true Z value.

## 8 ADDITIONAL RESULTS

### 8.1 PROBE SIZE

In our running abstraction example discussed in Supplemental Section 6, we observed that despite employing the same granularity, certain Ordered Partitioning Schemes may underutilize the allotted number of abstract states. Moreover, paths extended during initial iterations may become incomplete in subsequent iterations. These truncated paths may be pruned altogether and cut the number of nodes. To assess how effectively different schemes handle continual extension of paths, we fixed  $nAbs$  at 2048 and plotted the Probe Size against the number of variables for each problem in the Promedas benchmark (Plot 5).

**Plot 5:** For the given abstraction granularity and benchmark, the size of the probe (in log10) relative to the number of problem variables (in log10) using iB-10.

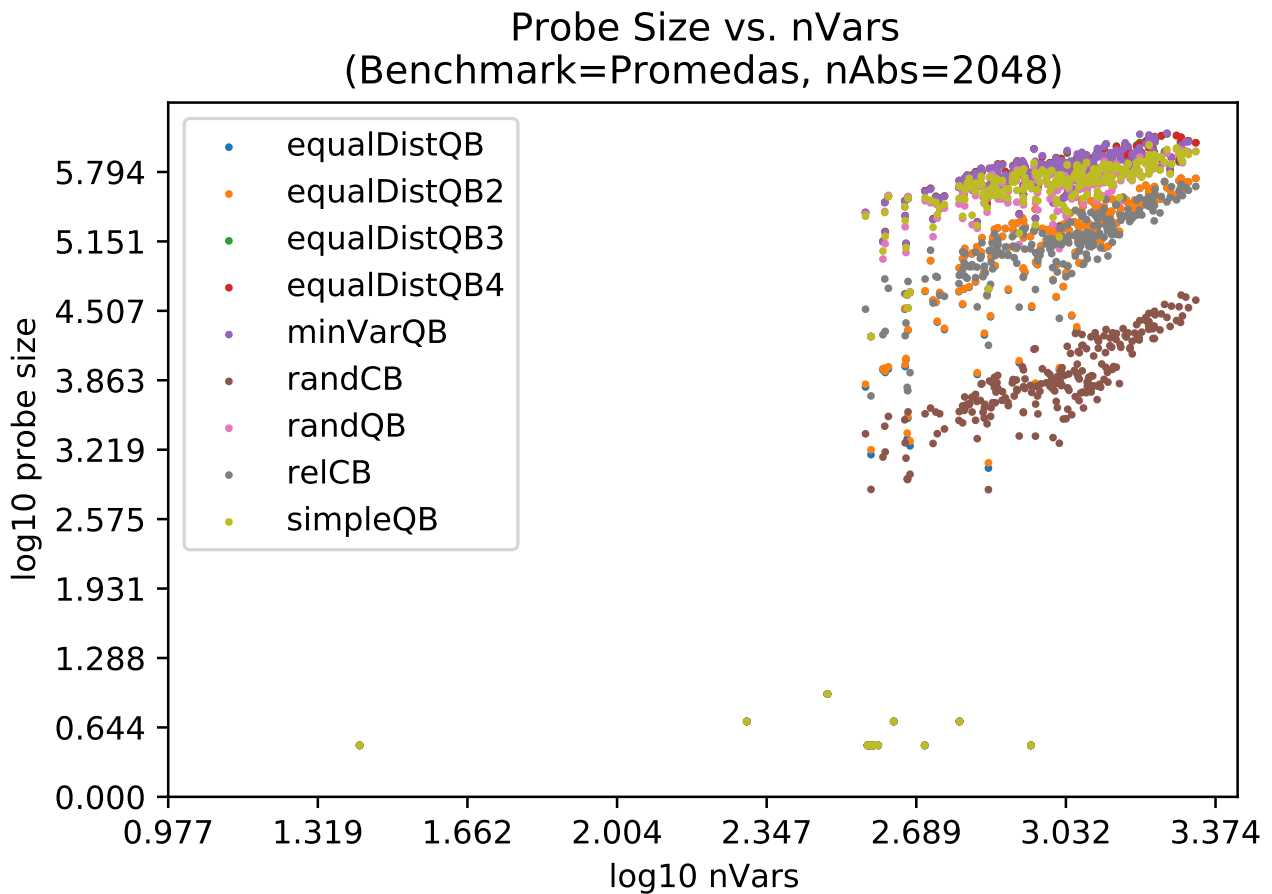

Even with the same granularity different abstraction functions can lead to vastly different utilization of abstract states, pruning, and thus probe sizes. Plot 5 highlights this. As seen in the plot (and generalizes across the different benchmarks and abstraction value classes) the simpleQB, minVarQB, equalDistQB3, equalDistQB4, and randQB schemes tend to produce larger probes, indicating more of the allotted abstract states utilized and fewer branches being pruned.

### 8.2 ABSTRACTION SPEED

In order to understand more about the speed of each scheme at performing abstractions, in Figure ?? we plot the number of samples versus average probe size for problems of the Promedas benchmark. (For other benchmarks and  $nAbs$ , please see

the Supplemental Materials).

**Plot 6:** For the given abstraction granularity and benchmark, the number of samples (in log10) relative to the probe size (in log10) using iB-10.

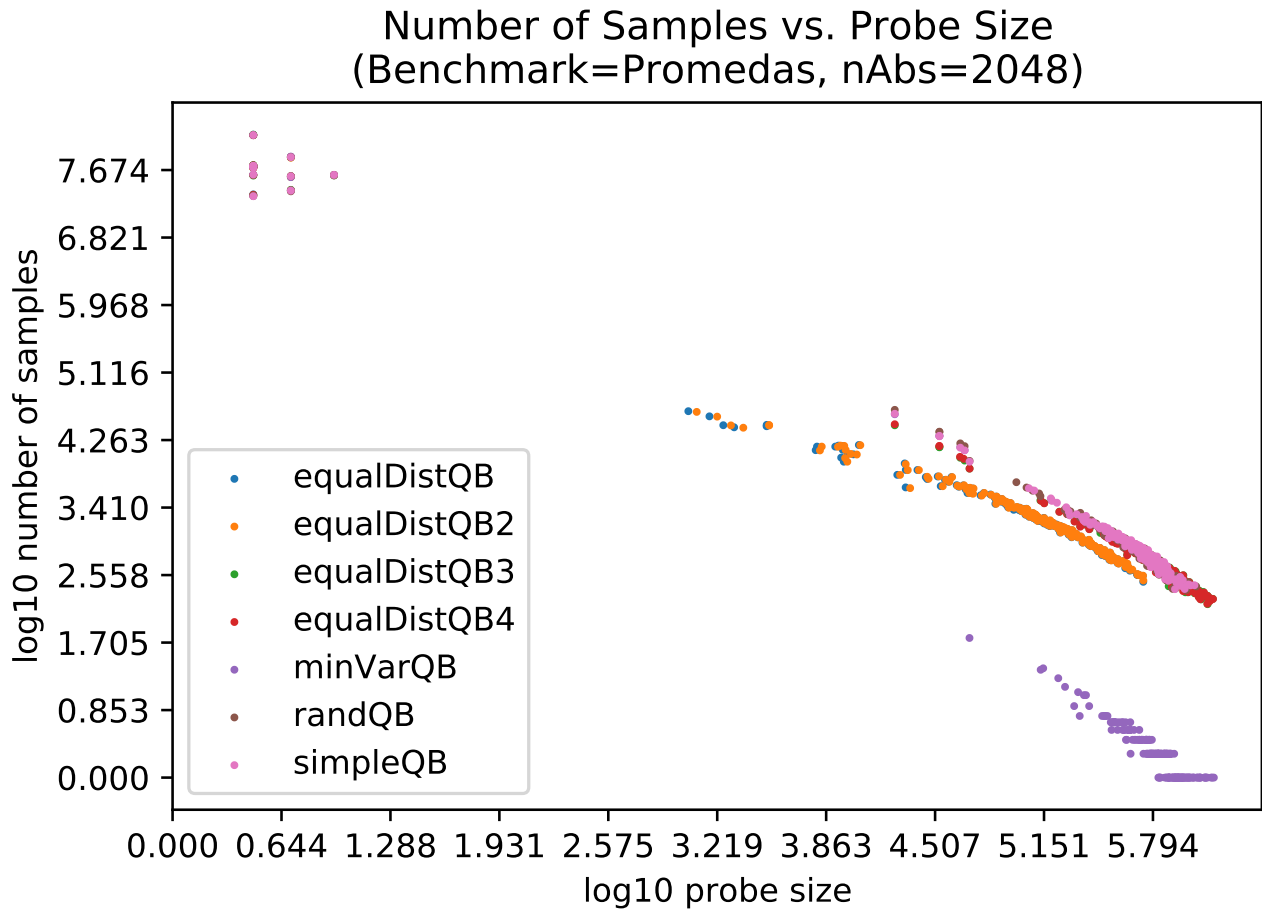

Plot 6 shows the number of samples that were able to be drawn relative to the size of generated probes, thus providing an understanding of the speed abstractions occur. As expected, we notice the minVar scheme (which utilizes a computationally intensive hierarchical clustering process to abstract nodes) has the lowest sample efficiency. The other schemes have comparable abstraction speeds.

## References

- Filjor Broka, Rina Dechter, Alexander Ihler, and Klev Kask. Abstraction sampling in graphical models. In *Proceedings of the Thirty-Fourth Conference on Uncertainty in Artificial Intelligence, UAI 2018, Monterey, California, USA, August 6-10, 2018*, pages 632–641, 2018. URL <http://auai.org/uai2018/proceedings/papers/234.pdf>.
- H. Kahn and A. W. Marshall. Methods of reducing sample size in monte carlo computations. *Journal of the Operations Research Society of America*, 1(5):263–278, 1953. ISSN 00963984. URL <http://www.jstor.org/stable/166789>.
- Klev Kask, Bobak Pezeshki, Filjor Broka, Alexander Ihler, and Rina Dechter. Scaling up and/or abstraction sampling. In Christian Bessiere, editor, *Proceedings of the Twenty-Ninth International Joint Conference on Artificial Intelligence, IJCAI-20*, pages 4266–4274. International Joint Conferences on Artificial Intelligence Organization, 7 2020. doi: 10.24963/ijcai.2020/589. URL <https://doi.org/10.24963/ijcai.2020/589>. Main track.
- G. N. Lance and W. T. Williams. A General Theory of Classificatory Sorting Strategies: 1. Hierarchical Systems. *The Computer Journal*, 9(4):373–380, 02 1967. ISSN 0010-4620. doi: 10.1093/comjnl/9.4.373. URL <https://doi.org/10.1093/comjnl/9.4.373>.
- Robert Mateescu, Rina Dechter, and Radu Marinescu. AND/OR multi-valued decision diagrams (aomdds) for graphical models. *J. Artif. Intell. Res. (JAIR)*, 33:465–519, 2008. doi: 10.1613/jair.2605. URL <http://dx.doi.org/10.1613/jair.2605>.
- Art B. Owen. *Monte Carlo theory, methods and examples*. <https://artowen.su.domains/mc/>, 2013.
- Maria L. Rizzo. *Statistical computing with R*. Chapman & Hall/CRC, 2007.
- Joe H. Ward. Hierarchical grouping to optimize an objective function. *Journal of the American Statistical Association*, 58 (301):236–244, 1963. ISSN 01621459. URL <http://www.jstor.org/stable/2282967>.
